1 **The Gag Protein PEG10 Binds to RNA and Regulates Trophoblast Stem Cell Lineage**  
2 **Specification.**

3

4 Mona Abed<sup>a</sup>, Erik Verschueren<sup>b</sup>, Hanna Budayeva<sup>b</sup>, Peter Liu<sup>b</sup>, Donald S. Kirkpatrick<sup>b</sup>, Rohit

5 Reja<sup>c</sup>, Sarah K. Kummerfeld<sup>c,g</sup>, Joshua D. Webster<sup>d</sup>, Sarah Gierke<sup>d</sup>, Mike Reichelt<sup>d</sup>, Keith R.

6 Anderson<sup>e</sup>, Robert J Newman<sup>e</sup>, Merone Roose-Girma<sup>e</sup>, Zora Modrusan<sup>e</sup>, Hazal Pektaş<sup>f</sup>, Emin

7 Maltepe<sup>f</sup>, Kim Newton<sup>a</sup>, Vishva M. Dixit<sup>a</sup>

8

9 Departments of Physiological Chemistry<sup>a</sup>, Protein Chemistry<sup>b</sup>, Bioinformatics and Computational

10 Biology<sup>c</sup>, Pathology<sup>d</sup>, and Molecular Biology<sup>e</sup>, Genentech, 1 DNA Way, South San Francisco,

11 CA 94080, USA. <sup>f</sup>The Center for Reproductive Sciences, Division of Neonatology, University of

12 California, San Francisco, CA, 94143.

13

14 <sup>g</sup>Current address: Kinghorn Centre for Clinical Genomics, Garvin Institute of Medical Research,

15 370 Victoria Street, Darlinghurst, NSW 2010, Australia.

16

17 Correspondence to VMD ([dixit@gene.com](mailto:dixit@gene.com); +1-650-225-1312)

18

19 **Short Title:** The role of PEG10 in trophoblast stem cells.

## 20 **ABSTRACT**

21 *Peg10* (paternally expressed gene 10) is an imprinted gene that is essential for placental  
22 development. It is thought to derive from a Ty3-gypsy LTR (long terminal repeat) retrotransposon  
23 and retains Gag and Pol-like domains. Here we show that the Gag domain of PEG10 can promote  
24 vesicle budding similar to the HIV p24 Gag protein. Expressed in a subset of mouse endocrine  
25 organs in addition to the placenta, PEG10 was identified as a substrate of the deubiquitinating  
26 enzyme USP9X. Consistent with PEG10 having a critical role in placental development, PEG10-  
27 deficient trophoblast stem cells (TSCs) exhibited impaired differentiation into placental lineages.  
28 PEG10 expressed in wild-type, differentiating TSCs was bound to many cellular RNAs including  
29 *Hbegf* (Heparin-binding EGF-like growth factor), which is known to play an important role in  
30 placentation. Expression of *Hbegf* was reduced in PEG10-deficient TSCs suggesting that PEG10  
31 might bind to and stabilize RNAs that are critical for normal placental development.

32

## 33 **INTRODUCTION**

34 Transposable elements (TEs) are one of the biggest threats to the integrity of prokaryotic and  
35 eukaryotic genomes because their insertion into coding or regulatory regions could disrupt  
36 essential genes (1-3). Therefore, TEs are often inactivated through mutagenesis (4) or silenced  
37 through methylation (5). Some TEs, however, have been repurposed during evolution for the  
38 benefit of the host in a process termed domestication (6), and have important roles in development  
39 and immunity (7-10).

40

41 *Peg10* is a domesticated TE that is expressed in eutherian mammals (8, 11). It has lost the ability  
42 to transpose, but retains the retroviral characteristic of frameshifting (FS) that allows the

43 translation of two overlapping reading frames from the same transcript (12). Thus, *Peg10* encodes  
44 PEG10-RF1 corresponding to the structural Gag-like protein, as well as PEG10-RF1/2  
45 representing a fusion of the Gag and Pol domains (12). *Peg10*-deficient mouse embryos are not  
46 viable because *Peg10* is required for formation of the labyrinth and spongiotrophoblast layers of  
47 the placenta (13). Precisely how the PEG10 proteins exert this function is unclear. Whether  
48 *PEG10*, which is also expressed in the human testis and ovary (14), has functions outside of the  
49 placenta is likewise unclear. Interestingly, *PEG10* is aberrantly expressed in some human tumors  
50 including hepatocellular carcinomas (14) and neuroendocrine prostate cancers (15).

51  
52 Here we study the role of PEG10 in mouse embryonic stem cells (ESCs) and trophoblast stem cells  
53 (TSCs) after identifying it as a substrate of the deubiquitinating enzyme USP9X. Expressed in  
54 several stem cell populations (16-18) as well as in differentiated cell types, USP9X is essential for  
55 mouse development (19). Diverse substrates of USP9X have been reported, including the pro-  
56 survival protein MCL-1 (20), the kinase ZAP70 (21), and the E3 ubiquitin ligases SMURF1 (22)  
57 and FBW7 (23), but it is unclear if these are critical substrates of USP9X in ESCs and TSCs.

58

## 59 **MATERIALS AND METHODS**

### 60 **ESCs and TSCs.**

61 The Genentech institutional animal care and use committee approved all mouse protocols.

62 *Usp9x<sup>fl/y</sup> Rosa26<sup>+/-CreERT2</sup>* ESCs were derived from blastocysts after crossing *Rosa26<sup>CreERT2</sup>*

63 (24) and *Usp9x<sup>fl</sup>* (19) mice. Blastocysts were cultured on irradiated mouse embryo fibroblasts

64 (PMEF-N, Millipore Sigma) in ESGRO-2i medium (Millipore Sigma SF016-100) for 13 days to

65 produce ESCs. The cells were subsequently maintained on PMEF-N cells in KNOCK-OUT

66 medium (Invitrogen) supplemented with 1000 U LIF (EMD Millipore), 15% fetal bovine serum  
67 (GE Health), 1× non-essential amino acids (Gibco), 2 mM L-glutamine (Gibco), and 50 μM 2-  
68 mercaptoethanol (EMD Millipore). A 3xFLAG sequence was inserted after the initiator ATG in  
69 *Peg10* by homologous recombination. *Usp9x*<sup>3xf/y</sup> and *Usp9x*<sup>C1566A/y</sup> ESCs were generated by  
70 Taconic (Germany) using C57BL/6 NTac ESCs. In brief, a 3xFLAG sequence was inserted after  
71 the initiator ATG in *Usp9x* exon 2 (*Usp9x*<sup>3xf/y</sup> ESCs) or the TGT codon encoding Cys1566 in  
72 *Usp9x* exon 31 was changed to GCC (*Usp9x*<sup>C1566A/y</sup> ESCs).

73  
74 TSCs were prepared as described (25) and cultured on plates pre-treated with CellStart substrate  
75 (A1014201, Thermo Fisher) for 2 h at 37°C. TSC culture medium was RPMI1670 containing 20%  
76 FBS, 1 mM sodium pyruvate, 2 mM L-glutamine, 50 μg/mL penicillin/streptomycin, 100 μM 2-  
77 mercaptoethanol, 0.1 mM FGF4 (F2278, Sigma), and 1 μg/mL Heparin (H3149, Sigma). For TSC  
78 differentiation, cells were split to a 30% density without CellStart, FGF4 or heparin, and cultured  
79 at 20% or 2% oxygen for 5-10 days while changing media every other day. For TSC transfection,  
80 cells were plated at 20% density on CellStart with FGF4 and Heparin, and then transfected the day  
81 after using Effectene transfection reagent (301425, Qiagen).

82  
83 PEG10-deficient ESCs and TSCs were generated using a two cut CRISPR strategy. Cells were  
84 co-transfected with pRK-Cas9 (38), *Peg10* 5' sgRNA (CTC TCA CCG CAG CCA TGG C) and  
85 3' sgRNA (GCA TCA TCC TGC AGT GCT G). sgRNAs were expressed from U6 promoters on  
86 individual plasmids.

87

88 **Antibodies.**

89 Antibodies recognized GAPDH (G9545, Sigma), PEG10 (Genentech monoclonal antibodies were  
90 raised against mouse PEG10 residues A2-V377; rat clone 17D4D6C2 was used for western  
91 blotting and immunofluorescence, mouse clone 36E2B2B4 was used for immunoprecipitations,  
92 and rat clone 5H7B1E3 was used for immuno-gold electron microscopy), USP9X (5679,  
93 Genentech), Syntaxin 8 (12206-1-AP, Proteintech), VTI1B (ab184170 Abcam), ABCD3 (ab3421,  
94 Abcam), ERK (9102, Cell Signaling), phospho-ERK (9101, Cell Signaling), MEK (4694, Cell  
95 Signaling), phospho-MEK (9154, Cell Signaling), p70 S6 Kinase (2708, Cell Signaling), phospho-  
96 p70 S6 Kinase (9234, Cell Signaling), Akt (4691, Cell Signaling), phospho-Akt (4060, Cell  
97 Signaling), FLAG (A8592, Sigma), HIV1 p24 (ab9071 Abcam), Sall4 (sc-101147, Santa Cruz  
98 Biotechnology), and TSG101 (GTX70255, GeneTex).

99

100 **Immunoprecipitation and fractionation.**

101 Cells were dounced in 10 mM Tris pH 7.4, 7.5 mM KCl, 1.5 mM MgCl<sub>2</sub>, 5 mM 2-mercaptoethanol,  
102 plus complete protease inhibitor and PhosSTOP phosphatase inhibitor cocktails (Roche).  
103 Insoluble material was removed by centrifugation. The soluble material was adjusted to 20 mM  
104 Tris pH 7.4, 135 mM KCl, 1.5 mM MgCl<sub>2</sub>, 2 mM EDTA, 2% Triton, and 20% glycerol before  
105 immunoprecipitation of PEG10 or USP9X. Immunoprecipitations with anti-FLAG M2 beads  
106 (Sigma) were eluted with FLAG or 3xFLAG peptide as appropriate. Cell lysates were fractionated  
107 with NE-PER Nuclear and Cytoplasmic Extraction Reagent (78833, Thermo Scientific).

108

109 **Affinity purification mass spectrometry experiments.**

110 Protein bands were excised into 10 gel pieces from top to bottom for each pulldown. The pieces  
111 were further de-stained in 50 mM  $\text{NH}_4\text{HCO}_3$ /50% acetonitrile (ACN), dehydrated in 100% ACN,  
112 and re-hydrated in 10 ng/ $\mu\text{L}$  trypsin on ice for 20 min. After removing the excess trypsin solution,  
113 digestion was performed at 37°C overnight in 25 mM  $\text{NH}_4\text{HCO}_3$ . Peptides were extracted in 1%  
114 formic acid (FA)/50% ACN, then 100% ACN, and dried in a SpeedVac. After reconstitution in  
115 solvent A (2% ACN/0.1% FA), peptides underwent reverse phase chromatography on a  
116 NanoAcquity UPLC system (Waters). Peptides were loaded onto a Symmetry® C18 column (1.7  
117 mm BEH-130, 0.1 x 100 mm) with a flow rate of 1  $\mu\text{L}/\text{min}$  and a gradient of 2% to 25% Solvent  
118 B (0.1% FA/2% water/ACN). Peptides were eluted directly into an Advance CaptiveSpray  
119 ionization source (Michrom BioResources/Bruker) with a spray voltage of 1.2 kV, and analyzed  
120 using an LTQ Orbitrap Elite mass spectrometer (ThermoFisher). Precursor ions were analyzed in  
121 the FTMS at 60,000 resolution; MS/MS data was acquired in the LTQ with the instrument operated  
122 in data-dependent mode, whereby the top 15 most abundant ions were subjected to fragmentation.  
123  
124 MS/MS spectra were searched using the Mascot algorithm (Matrix Sciences) against a  
125 concatenated target-decoy database comprised of the UniProt Mus musculus protein sequences  
126 (downloaded June 2016), known contaminants, and the reversed versions of each sequence. A 50  
127 ppm precursor ion mass tolerance and 0.8 Da fragment ion tolerant were selected with tryptic  
128 specificity up to 3 missed cleavages. Fixed modifications were allowed for carbamidomethylated  
129 cysteine residues (+57.0215 Da) and variable modifications were permitted for methionine  
130 oxidation (+15.9949 Da). Peptide assignments were first filtered to a 1% False Discovery Rate  
131 (FDR) at the peptide level and subsequently to a 2% FDR at the protein level. Peptide Spectral

132 Matches (PSMs) per protein were summed across all fractions from the GelC-MS experiment for  
133 each IP separately. SAINTExpress-spc v.3.6.1 (26) was run with default settings, comparing the  
134 sum of PSMs for all identified proteins enriched with the IP antibody to their negative controls,  
135 for each AP-MS experiment separately. Interactions with a SAINT score  $> 0.9$ , Bayesian False  
136 Discovery Rate (BFDR)  $< 0.05$ , and average sum PSM count  $> 10$  were marked.

137

### 138 **Ubiquitin substrate profiling.**

139 ESC lysate (40 mg) was prepared under denaturing conditions, reduced and alkylated, diluted 4-  
140 fold, and then subjected to overnight trypsin digestion. Peptides were acidified with trifluoroacetic  
141 acid (TFA), desalted by solid-phase extraction, and lyophilized for 48 h. Dry peptides were  
142 resuspended in 1x IAP buffer (Cell Signaling Technologies), clarified by centrifugation, then  
143 incubated with anti-KGG coupled resin (Cell Signaling Technologies) for 2 h at 4°C. Beads were  
144 washed twice with IAP buffer, four times with water, and eluted twice using 0.15% TFA. Peptide  
145 eluates were desalted using STAGE-Tips and analyzed using an Orbitrap-Elite mass spectrometer  
146 as described previously (27). Peptide spectral matching was performed using semi-tryptic  
147 specificity and  $\pm 25$  ppm mass precursor tolerance using Mascot (Matrix Science). A target-decoy  
148 database comprised mouse proteins (UniProt ver. 2011\_12) and common contaminants. Oxidized  
149 methionine (+15.9949) and K-GG (+114.0429) were considered as variable modifications,  
150 carbamidomethyl cysteine (+57.0214) as a fixed modification, and two missed cleavage events  
151 were permitted. Peptide spectral matches were filtered serially using linear discriminant analysis  
152 to 5% and 2% FDR at the peptide and protein levels, respectively. Label-free peak areas were  
153 determined for confidently identified peptides using the XQuant algorithm and consolidated at the  
154 protein level using linear mixed effects modeling as described previously (28).

155

156 **Global proteome and phosphoproteome analysis.**

157 Cells were lysed in 20 mM HEPES pH 8.0, 9 M urea, and phosphatase inhibitor cocktail (Roche).  
158 Lysates were sonicated on a microtip and insoluble material was removed by centrifugation.  
159 Approximately 30 mg of total protein per condition was reduced and alkylated in 5 mM DTT and  
160 15 mM iodoacetamide, respectively. Protein mixtures were diluted 4-fold in 20 mM HEPES, pH  
161 8.0 and sequentially digested with LysC (1:50, enzyme:protein, Wako) and trypsin (1:100,  
162 enzyme:protein, Thermo Fisher Scientific). Peptide mixtures were purified on SepPak columns  
163 (Waters) and lyophilized to dryness. An aliquot of the digested peptides from each condition was  
164 processed for global proteome profiling. Briefly, 200 µg of total peptides per condition were  
165 labeled with tandem mass tag (TMT10plex and TMT11, Thermo Fisher Scientific). After >98%  
166 TMT incorporation rate was confirmed, samples were combined and fractionated by high pH  
167 Reverse Phase LC (Agilent Technologies) into 24 fractions for analysis as described previously  
168 (29).

169

170 From the majority of the sample, phosphopeptides were enriched using TiO<sub>2</sub> titansphere resin (GL  
171 Sciences). Peptides were reconstituted in 50% ACN and 2 M lactic acid buffer, and incubated at  
172 1:5 peptide:titansphere ratio for 2 h at room temperature. The titansphere particles were washed  
173 sequentially in 50% ACN/2M lactic acid, 50% ACN/0.1% TFA, and 25% ACN/0.1% TFA.  
174 Phosphopeptides were eluted with 50 mM K<sub>2</sub>HPO<sub>4</sub> pH 10 buffer and lyophilized. Enriched  
175 peptides were labeled with TMT10plex and TMT11 reagents (Thermo Fisher Scientific). Samples  
176 were combined and processed for phosphotyrosine (pY) enrichment using p100 PTMScan reagent



177 (Cell Signaling Technologies). The flow-through fraction (pST) was subject to high pH reverse  
178 phase fractionation into 24 fractions for analysis as described previously (29).

179

180 **Liquid chromatography and tandem mass spectrometry.**

181 TMT-labeled peptides for global proteome, KGG, pST and pY profiling were desalted on C18  
182 stage tip, dried by vacuum centrifugation, and reconstituted in 2% ACN/0.1% FA for analysis. All  
183 samples were analyzed by liquid chromatography coupled to tandem mass spectrometry (LC-MS)  
184 on Dionex Ultimate 3000 RSLCnano system (Thermo Fisher Scientific) and Orbitrap Fusion  
185 Lumos Tribrid MS (Thermo Fisher Scientific). Peptide samples were resolved by 158 min linear  
186 gradient of 2% to 30% buffer B (98% ACN/0.1% FA) in buffer A (2% ACN/0.1% FA) on 100  $\mu$ m  
187 ID PicoFrit column packed with 1.7  $\mu$ m Acquity BEH (New Objective) at a flow rate of 450  
188 nL/min. Total run length including injection, gradient, column washing and re-equilibration was  
189 180 min. Multi-Notch MS3-based TMT method was used for sample analysis where the duty  
190 cycle involves collecting: 1) an MS1 scan in the Orbitrap at 120,000 resolution across 350-1350  
191 m/z range with automatic gain control (AGC) target of 1.0e6, 50 ms maximum injection time; 2)  
192 data dependent ion trap MS2 scans on the top 10 peptides with CID activation, 0.5 m/z isolation  
193 window in quadrupole, turbo scan rate, 2.0e4 AGC target, 100 ms maximum injection time; and  
194 3) Orbitrap SPS-MS3 scans of 8 MS2 fragment ions, with isolation widths of 2 m/z using isolation  
195 waveforms with multiple frequency notches as described previously (30). MS3 precursor ions  
196 were fragmented by high energy collision-induced dissociation and analyzed by Orbitrap at 50,000  
197 resolution, AGC target 2.5e5, 150 ms maximum injection time.

198

199 **Data analysis for global and phospho-proteome multiplexed proteomics.**

200 MS/MS spectra were searched using the Mascot algorithm (Matrix Sciences) against a  
201 concatenated target-decoy database comprised of the UniProt Mus musculus protein sequences  
202 (downloaded June 2016), known contaminants, and the reversed versions of each sequence. A 50  
203 ppm precursor ion mass tolerance and 0.8 Da fragment ion tolerant were used with tryptic  
204 specificity, and up to 2 missed cleavages permitted. Fixed modifications were considered for  
205 carbamidomethylated cysteine residues (+57.0215 Da) and the TMT modification of the N-  
206 terminus and K residues (+229.1629 Da). Variable modifications were permitted for methionine  
207 oxidation (+15.9949 Da), phosphorylation on S/T/Y (+79.9663 Da) and TMT modification of Y  
208 (+229.1629 Da). Search results were filtered to 1% FDR at the peptide level and 2% FDR at the  
209 protein level using in house tools as described previously (28). Phospho-sites on peptides were  
210 localized with Ascore (31) and all peptides spanning phospho-sites were grouped using their  
211 residue and position nomenclature prior to modeling. MS3 based TMT quantification was  
212 performed using our in-house Mojave module (32), filtering out TMT peaks in MS3 scans whose  
213 reporter ion intensity sum < 30,000, across all 11 channels. For each peptide, the respective  
214 reporter ion intensities were summed across PSMs. Sequences <7 residues were further removed  
215 due to ambiguity in peptide to protein mapping. Then, for each protein or phospho-site, a model  
216 was fitted in MSstats v3.7.1 (33) using Tukey Median Polish summary on all quantified peptides  
217 across replicates with imputation of missing values below a censoring threshold of  $2^8$ . Within  
218 MSstats, the model estimated fold change and statistical significance were computed for all  
219 compared treatment groups. Significantly altered proteins or phospho-sites were determined by  
220 setting a threshold of  $|\text{Log}_2(\text{fold-change})| > 1$  and p-value < 0.05. The subset of significantly  
221 altered phospho-sites, unaltered at the protein level, was then annotated and tested for over-

222 represented biological annotations using the MsigDB collection and GSEA (34). Significant  
223 annotations were defined by an enrichment q-value < 0.05.

224

#### 225 **Lentivirus and PEG10 VLP generation.**

226 HEK293T cells ( $10^7$ ) plated on gelatin-coated 10 cm dishes were transfected with 5  $\mu$ g pGCMV-  
227 MCS-IRES-eGFP (Genentech), Delta 8.9 or Delta 8.9-PEG10 (PEG10 residues 1-377 were cloned  
228 into the p24 region of the Delta 8.9 vector), and VSV-G at a molar ratio of 1:2.3:0.2 using  
229 Lipofectamine 2000 (Thermo Fisher). Media was replenished 6 h post-transfection and the  
230 supernatant collected after a further 40 h. Lentivirus particles or VLPs were isolated using a Lenti-  
231 X Concentrator (321231, Clontech).

232

#### 233 **Protease protection assay.**

234 Lentiviruses and PEG10 VLPs were resuspended in PBS. Half of the sample was incubated with  
235 1% Triton X-100, 0.5% TriButyl, and 0.2% SDS, and sonicated briefly to permeabilize the lipid  
236 bilayer. 1  $\mu$ g trypsin (V511A, Promega) was added to both samples (-/+ Triton) and incubated for  
237 0, 30, 60, and 120 min on ice. Trypsinization was stopped by adding 5 mM PMSF. Samples were  
238 boiled for 10 min in NuPAGE LDS Sample Buffer (NP0008, Thermo Fisher) and NuPAGE  
239 Sample Reducing Agent (NP0004, Thermo Fisher).

240

#### 241 **Vesicle isolation.**

242 Culture supernatants were centrifuged at 1500 x g, then 10,000 x g, and then filtered through a  
243 0.22  $\mu$ m vacuum filter unit. Further centrifugation at 100,000 x g for 2 h yielded a vesicle-  
244 containing pellet. For sucrose gradient purification, the pellet was resuspended in 60% sucrose in

245 20 mM Tris-HCl pH 7.4 and 0.85% NaCl. This suspension was layered with 40% and 20% sucrose  
246 in 20 mM Tris-HCl pH 7.4 and 0.85% NaCl, and centrifuged at 150,000 x g for 14 h.

247

#### 248 **Microscopy.**

249 For immuno-electron microscopy, vesicles were adsorbed onto formvar/carbon-coated grids for  
250 20 min, and then fixed and permeabilized for 30 min with 4% paraformaldehyde (PFA) in PBS  
251 containing 5% Triton X-100. Samples were quenched in PBS/glycine, rinsed in PBS, and labeled  
252 for 1 h with 20 µg/mL anti-PEG10 antibody diluted in EM blocking solution (EMS, Aurion).  
253 Samples were washed in PBS for 15 min, and then incubated for 1 h with goat anti-rat 6 nm gold  
254 conjugate (Jackson ImmunoResearch) diluted 1/10 in EM blocking solution. Samples were  
255 washed in PBS for 10 min, rinsed in water, and stained with 2% ammonium molybdate for 30 sec.  
256 Samples were imaged with JEOL JEM-1400 TEM, Ultrascan 1000 CCD camera. For negative  
257 stain microscopy, samples were adsorbed to grids for 20 min, rinsed with water, and stained with  
258 1% uranyl acetate for 60 sec.

259

#### 260 **Immunohistochemistry.**

261 Sections of formalin-fixed, paraffin-embedded C57BL/6J mouse tissues (5 µm) were baked for 20  
262 min at 70°C. Deparaffinization and hydration was performed in a Leica Autostainer XL (Leica  
263 Biosystems). Sections were quenched in 3% H<sub>2</sub>O<sub>2</sub> for 4 min, blocked using a ScyTek Blocking  
264 Kit (BBK120, ScyTek Laboratories), and then incubated in 10% donkey serum in 3% BSA/PBS  
265 for 30 min. Labeling was for 1 h with 5 µg/ml anti-PEG10 antibody or IgG2b isotype control  
266 (553986, BD Pharmingen) in PBS containing 10% donkey serum and 3% BSA, followed by 30  
267 min with 5 µg/ml biotinylated donkey anti-rat antibody (712-065-153, Jackson Laboratories).

268 Sections were treated with Vectastain ABC Elite Reagent (PK-6100, Vector Labs) and then  
269 incubated with Pierce Metal Enhanced DAB (3406, Thermo Fisher) for 5 min. Counterstaining  
270 was with Mayers filtered hematoxylin.

271

### 272 **Immunofluorescence labeling.**

273 Cells were fixed with 8% PFA, blocked for 1 h with 10% donkey serum, 2% BSA, and 0.2%  
274 saponin in PBS, incubated overnight at 4°C in 5 µg/ml anti-PEG10 antibody in blocking buffer,  
275 and then for 1 h at room temperature in 2 µg/mL Alexa 488-conjugated donkey anti-rat antibody  
276 (A-21208, Thermo Fisher). Slides were mounted with ProLong Gold containing DAPI (P36931,  
277 Thermo Fisher). Confocal images were captured with a LEICA SP5 laser-scanning confocal  
278 microscope.

279

### 280 **RNA sequencing.**

281 Total RNA was extracted using a RNeasy Mini Kit (Qiagen), quantified in a NanoDrop 8000  
282 (ThermoFisher), and assessed for integrity using both 2100 5 Bioanalyzer and 2200 TapeStation  
283 (Agilent). Libraries were prepared from 1 µg of total RNA with TruSeq RNA Sample Preparation  
284 Kit v2 (Illumina). Library size was confirmed using 2200 TapeStation and High Sensitivity D1K  
285 screen tape (Agilent), and concentration was determined by Library quantification kit (KAPA).  
286 Libraries were multiplexed five per lane and sequenced in a HiSeq2500 (Illumina) to generate 50  
287 million paired end 75 bp reads. Filtering of fastq sequence files removed poor quality reads (read  
288 length < 18 or > 30% of cycles with Phred score < 23). Raw FASTQ reads were aligned to the  
289 mouse reference genome (GRCm38-mm10) using GSNAP (with parameters -M 2 -n 10 -B 2 -i 1  
290 -N 1 -w 200000 -E 1 -- pairmax-rna=200000 --clip-overlap). Reads were filtered to include only

291 the uniquely mapped reads. Differential expression analysis was performed using the voom/limma  
292 R package (35). Genes were considered differentially expressed if the log<sub>2</sub> fold change was > 1  
293 or < -1, and adjusted p-value < 0.05. Pathway analysis was performed with the R package EGSEA  
294 (36).

295

## 296 **eCLIP**

297 eCLIP was performed by Eclipse BioInnovations Inc (San Diego) essentially as described (37). In  
298 brief,  $2 \times 10^7$  TSCs were UV (254 nm)-crosslinked at  $0.4 \text{ J/cm}^2$ , snap frozen, and then lysed prior  
299 to treatment with RNase I. PEG10 was immunoprecipitated with anti-PEG10 antibody pre-  
300 coupled to sheep anti-mouse Dynabeads (Thermo Fisher) overnight at 4°C. 20% of the sample  
301 was used for western blotting, 2% was used as a paired input, and the remainder was processed for  
302 eCLIP. Raw FASTQ files were trimmed of 3' barcodes and adapter sequences. Reads were  
303 aligned to the mouse reference genome (GRCm38-mm10) using STAR {Dobin, 2013 #1496}  
304 followed by removal of PCR duplicates and reads mapping to repetitive elements in the genome.  
305 MACS2 {Zhang, 2008 #1426} was used to call peaks in wild-type samples using PEG10-deficient  
306 samples as controls. In Fig 7B, each PEG10 bound gene was divided into 100 bins between the  
307 Transcription Start Site (TSS) and the Transcription End Site (TES), and into 20 bins upstream  
308 and downstream of TSS and TES, respectively. For each bin, count of 5'-end of each eCLIP read  
309 was calculated and summed across all genes to create the average profile per sample. All samples  
310 were normalized to sequencing depth.

311

312 **Raw data deposition.**

313 All mass spectrometry raw files were uploaded on the Massive data repository and can be  
314 downloaded from <ftp://MSV000083229@massive.ucsd.edu> (login: MSV000083229\_reviewer,  
315 password: a). eCLIP and RNAseq data have been deposited to the Gene Expression Omnibus  
316 (GEO accession number GSE122217). Data can be accessed using the token “kpmneycydrcvdat”.

317

318 **RESULTS AND DISCUSSION**

319 **PEG10 is regulated by USP9X.**

320 We identified PEG10 while looking for substrates of the deubiquitinating enzyme USP9X in  
321 mouse ESCs. USP9X was affinity purified from *Usp9x*<sup>3xf/y</sup> ESCs, which had a 3xFLAG epitope  
322 tag inserted in frame with the N-terminus of USP9X. Co-immunoprecipitating proteins captured  
323 with anti-FLAG antibody and identified by mass spectrometry included PEG10 (Fig 1A). We  
324 confirmed that both PEG10-RF1 and PEG10-RF1/2 also interacted with untagged USP9X using  
325 *Peg10*<sup>+/3xf</sup> *Usp9x* *Rosa26*<sup>+/CreERT2</sup> ESCs, which delete *Usp9x* in response to 4-  
326 hydroxytamoxifen and express PEG10 proteins tagged at the N-terminus with 3xFLAG.  
327 Importantly, a USP9X antibody co-immunoprecipitated 3xFLAG.PEG10-RF1 and  
328 3xFLAG.PEG10-RF1/2 only when the ESCs expressed USP9X (Fig 1B). Ubiquitin-substrate  
329 profiling by K-ε-GG mass spectrometry (38) revealed PEG10 as a putative substrate of USP9X  
330 because *Usp9x*<sup>C1599A/y</sup> ESCs expressing catalytically inactive USP9X C1599A (Fig 1C) contained  
331 more ubiquitinated PEG10 than wild-type ESCs (Fig 1, D-F). PEG10 deubiquitination by USP9X  
332 appeared to stabilize PEG10-RF1 specifically because USP9X-deficient ESCs contained less  
333 PEG10-RF1 than control ESCs, whereas the amount of PEG10-RF1/2 was largely unaltered (Fig  
334 1, B and G). Consistent with ubiquitinated PEG10-RF1 being targeted for proteasomal

335 degradation, the proteasome inhibitor MG-132 increased the amount of PEG10-RF1 in USP9X-  
336 deficient ESCs, but had little impact on PEG10-RF1/2 (Fig 1G). PEG10-RF1 has six unique  
337 residues that are located in the frameshift region and are not found in PEG10-RF1/2 (12), so these  
338 may contribute to a degron motif that specifies its proteasomal degradation. We did not detect any  
339 ubiquitination sites within the frameshift region, but USP9X suppressed ubiquitination of two  
340 adjacent lysines (K365, K362). Whether mutation of these lysines impacts PEG10-RF1 stability  
341 is an area of future investigation.

342

343 **Fig 1. PEG10 is a substrate of USP9X.**

344 (A) USP9X interaction network showing all high confidence binding partners connected by solid  
345 lines (Saint > 0.9, FDR < 0.05, Avg. Psms > 10). Dotted lines indicate interactions reported in the  
346 BioPlex network (50, 51). Results are representative of 3 independent experiments. (B) Western  
347 blots of *Peg10*<sup>3xf/+</sup> *Usp9x*<sup>fl/y</sup> *Rosa26.CreER*<sup>T2</sup> ESCs after immunoprecipitation (IP) of USP9X.  
348 Epitope-tagged PEG10 was detected with anti-FLAG antibody. Where indicated, ESCs were  
349 treated with 4-hydroxytamoxifen (4-OHT) to delete *Usp9x*. Results are representative of 2  
350 independent experiments. (C) Western blots of ESCs. (D) Geysler plot showing proteins  
351 differentially ubiquitinated in *Usp9x*<sup>C1566A/y</sup> ESCs versus control *Usp9x*<sup>+/y</sup> ESCs (p < 0.05, log<sub>2</sub>  
352 fold change > 2). Results are representative of 2 independent experiments. (E) Line plot showing  
353 the fold-change in abundance of all ubiquitinated PEG10 peptides between *Usp9x*<sup>+/y</sup> and  
354 *Usp9x*<sup>C1566A/y</sup> ESCs. Each grey line corresponds to a unique KGG peptide spectral match  
355 peptide. The red line indicates a model-based protein abundance estimate. AUC, area under the  
356 curve.



357 (F) Diagram indicating the position of the USP9X-regulated ubiquitination (Ub) sites in PEG10.  
358 Triangles depict ubiquitination sites identified only in *Usp9x*<sup>C1566A/y</sup> ESCs. Circles depict sites  
359 found in *Usp9x*<sup>+/y</sup> and *Usp9x*<sup>C1566A/y</sup> ESCs. Circle size indicates the extent to which  
360 ubiquitination was increased by USP9X inactivation. (G) Western blots of *Peg10*<sup>3xf/+</sup> *Usp9x*<sup>fl/y</sup>  
361 *Rosa26*.CreER<sup>T2</sup> ESCs. Where indicated, cells were treated with 10 μM MG-132 for 4 h. Results  
362 are representative of 2 independent experiments.

363

#### 364 **The PEG10 Gag domain forms virus-like particles.**

365 The biochemical roles of PEG10 are unknown. The Gag polyproteins of Ty3 retrotransposons  
366 have been shown to assemble virus-like particles (VLPs) (39), so we explored whether the  
367 conserved PEG10 Gag domain could substitute for the p24 HIV-1 Gag protein in a lentiviral  
368 packaging system. HEK293T cells were co-transfected with VSV-G envelope protein and either  
369 HIV-1 Gag-Pol or a hybrid construct encoding PEG10-RF1 and HIV-1 Pol. Both p24 and PEG10-  
370 RF1 were detected in the culture supernatant by western blotting (Fig 2A), suggesting that both  
371 Gags assembled VLPs. Sucrose gradient centrifugation suggested the putative PEG10-RF1 VLPs  
372 were denser than the HIV-1 p24 VLPs (Fig 2B). VLPs that bud from the cell are encapsulated in  
373 a lipid bilayer that protects Gag proteins from digestion with trypsin. Accordingly, PEG10-RF1  
374 in culture supernatants was only cleaved by trypsin in the presence of the bilayer-disrupting  
375 detergent Triton X-100 (Fig 2C). Indeed, lipid bilayer-encapsulated PEG10-RF1 VLPs were  
376 detected by negative stain electron microscopy (Fig. 2D).

377

378 **Fig 2. The PEG10 Gag domain generates virus-like particles.**

379 (A) Western blots of HEK293T cells or extracellular vesicles recovered from the culture medium  
380 after transfection with VSV-G and increasing amounts of Gag-Pol cDNA. Results are  
381 representative of 2 independent experiments. (B) Western blots of extracellular vesicles in panel  
382 A after sucrose gradient density centrifugation. The upper blot shows cells transfected with HIV-1  
383 Gag, whereas the lower blot shows cells transfected with PEG10-RF1. We speculate that the faster  
384 migrating PEG10-RF1 species is a processed form of the protein. Results are representative of 2  
385 independent experiments. (C) Western blots of VLPs. Results are representative of 3 independent  
386 experiments. (D) Electron micrographs of negatively stained VLPs. Scale bar, 20 nm. Results  
387 are representative of 2 independent experiments. (E) Western blots of wild-type ESCs and TSCs.  
388 Results are representative of 2 independent experiments. (F) Western blots of HEK293T cells  
389 ectopically expressing wild-type (WT) mouse PEG10 or a PEG10 frameshift (FS) mutant that can  
390 only make PEG10-RF1/2. Results are representative of 2 independent experiments. (G) Western  
391 blots of extracellular vesicles shed from WT or PEG10-deficient (KO) TSCs and enriched by  
392 differential centrifugation. Results are representative of 5 independent experiments. (H) Western  
393 blots of extracellular vesicles shed from WT TSCs and analyzed by sucrose gradient density  
394 centrifugation. Results are representative of 2 independent experiments. (I) Electron micrographs  
395 of TSC extracellular vesicles after immuno-gold labeling for PEG10. Scale bar, 50 nm.

396

397 Next, we determined if endogenous PEG10 was in vesicles shed from trophoblast stem cells  
398 (TSCs), which express even more PEG10 than ESCs (Fig 2E). PEG10 was detected with a  
399 monoclonal antibody that was raised against PEG10-RF1, and therefore detects both PEG10-RF1  
400 and PEG10-RF1/2 (Fig 2, E and F). We found that both PEG10-RF1 and PEG10-RF1/2 were

401 present in supernatant fractions enriched for TSC extracellular vesicles (Fig 2, G and H). The  
402 exosome marker TSG101 (40) served as a positive control. Electron microscopy and immuno-  
403 gold labeling for PEG10 confirmed the presence of PEG10-bearing vesicles (Fig 2I). Collectively,  
404 our data suggest that the PEG10 Gag domain supports constitutive VLP assembly.

405

406 To investigate the mechanism of PEG10 budding, we affinity purified PEG10 from ESCs and  
407 TSCs and then identified co-immunoprecipitating proteins by mass spectrometry (Fig 3A).  
408 Consistent with our previous experiments, PEG10 interacted with USP9X and USP9X-associated  
409 proteins such as ATXN10, IQCB1, BAG6 and UBL4. Intriguingly, two proteins involved in  
410 vesicle fusion, VTI1B and STX8 (41, 42), also coimmunoprecipitated with PEG10 (Fig 3, A and  
411 B). It is tempting to speculate that VTI1B and STX8 might regulate the budding of PEG10-  
412 containing vesicles.

413

### 414 **Fig 3. Proteins interacting with PEG10 in ESCs and TSCs.**

415 (A) PEG10 interaction network showing all high confidence binding partners connected by solid  
416 lines (Saint > 0.9, FDR < 0.05, Avg. Psms > 10). Dotted lines indicate interactions reported in the  
417 Bioplex interaction network. Proteins co-immunoprecipitated from both TSCs and ESCs are  
418 colored red, and those unique to ESCs are green. Results are representative of 3 independent  
419 experiments. (B) Western blots before and after immunoprecipitation (IP) of 3xFLAG.PEG10  
420 from knock-in ESCs, or as a control, PEG10-deficient (KO) ESCs. Results are representative of  
421 2 independent experiments.

422

### 423 **PEG10 is expressed in a subset of adult mouse tissues.**

424 PEG10 has been studied largely in developmental settings and in cancer cell lines, so we  
425 determined its expression in a broad panel of mouse tissues. PEG10-RF1 and PEG10-RF1/2 were  
426 both abundant in adrenal gland, testis and placenta, whereas pituitary, ovary, uterus, white adipose,  
427 brain and lung expressed them to a lesser extent (Fig 4A). Additional faster migrating bands  
428 detected by the PEG10 antibody may reflect proteolytic processing of PEG10. Immunolabeling  
429 of tissue sections revealed that PEG10 was expressed highly in the cortex of the adrenal gland, the  
430 pars distalis of the pituitary gland, the sertoli cells of the testis, the hypothalamus, and in the  
431 labyrinth and trophoblast layers of the placenta (Fig 4B). Expression of PEG10 in the pituitary  
432 gland is interesting given that PEG10-deficient mice generated by tetraploid complementation  
433 exhibit severe growth retardation (13). PEG10 appeared largely cytoplasmic in the different  
434 mouse tissues. Immunofluorescence staining (Fig 4C) and biochemical fractionation studies (Fig.  
435 4D) indicated that PEG10 in ESCs and TSCs was also mostly cytoplasmic. Both PEG10-RF1 and  
436 PEG10-RF1/2 were in the cytoplasm of ESCs, but some PEG10-RF1/2 was nuclear in TSCs (Fig.  
437 4D). Therefore, the cellular localization of PEG10 appears context-dependent.

438

439 **Figure 4. Expression of PEG10 in mouse tissues.**

440 (A) Western blots of C57BL/6 mouse tissues. Results are representative of 3 independent  
441 experiments. (B) Mouse tissue sections immunolabeled for PEG10 (brown). AC, adrenal cortex.  
442 AM, adrenal medulla. LN, Labyrinth. T, Trophoblast. DB, decidua basalis. ST, Sertoli cells. LC,  
443 Leydig cells. PN, pars nervosa. PI, pars intermedia. PD, pars distalis. Th, thalamus. Hyp,  
444 Hypothalamus. Scale bar, 100  $\mu$ m. Results are representative of 3 independent experiments.  
445 (C) Immunofluorescence staining of PEG10 in ESCs or TSCs. Scale bar, 25  $\mu$ m. Results are  
446 representative of 2 independent experiments. (D) Western blots of ESCs and TSCs that were

447 fractionated into cytoplasmic (cyto) and nuclear (nuc) compartments. Results are representative  
448 of 3 independent experiments.

449

450 **PEG10 is essential for TSC differentiation.**

451 PEG10 is essential for formation of the labyrinth and spongiotrophoblast layers of the placenta  
452 (13). TSCs isolated from the early blastocyst can be differentiated into cells of the labyrinth and  
453 spongiotrophoblast layers (25), so we utilized this culture system to further explore the function  
454 of PEG10. TSCs were maintained in their pluripotent state on CELLstart extracellular matrix in  
455 the presence of fibroblast growth factor 4 (Fgf4) and heparin, or they were differentiated in the  
456 absence of CELLstart, Fgf4, and heparin in either 20% oxygen, to form the multinucleated  
457 syncytiotrophoblasts (SynTs) of the labyrinth, or 2% oxygen, to form the spongiotrophoblasts and  
458 trophoblast giant cells (TGCs) of the junctional zone. We noted that expression of PEG10-RF1/2  
459 and PEG10-RF1 increased as TSCs were differentiated in 20% oxygen (Fig 5A). Upregulation of  
460 PEG10 was functionally significant because CRISPR-Cas9-mediated deletion of *Peg10* (Fig. 4D)  
461 impaired TSC differentiation under both normoxic and hypoxic conditions (Fig 5, B and C).  
462 Morphologically, PEG10-deficient cells retained an undifferentiated appearance (Fig 5B), and by  
463 RNA sequencing (RNA-seq), they failed to manifest the transcriptional signature of wild-type,  
464 differentiated TSCs (Fig 5C; data available in full through the GEO database, accession  
465 GSE122217).

466

467 **Figure 5. PEG10 regulates the differentiation of TSCs.**

468 (A) Western blots of TSCs differentiated in 20% oxygen for the times indicated. *Peg10* mRNA  
469 expression was determined by quantitative RT-PCR. (B) Micrographs of wild-type (WT) and

470 PEG10-deficient (KO) TSCs. Results are representative of 5 independent experiments.  
471 (C) Principal Component Analysis (PCA) of TSC RNA-seq datasets using log<sub>2</sub> RPKM values.  
472  
473 Global proteome and phospho-serine/-threonine/-tyrosine profiling revealed many differences  
474 between wild-type and PEG10-deficient TSCs following differentiation (Fig 6, A-D). One  
475 particularly interesting difference was the altered phospho-status of key signaling proteins such as  
476 MAPK1, MAPK3, MTOR, INSR, and EGFR (Fig 6, B and E). Indeed, enrichment analysis of  
477 differentially phosphorylated proteins highlighted aberrant MTOR, Insulin, ErbB, and MAPK  
478 signaling (Fig 6F). Phosphoproteome analysis also allowed us to map phospho-sites within PEG10  
479 (Fig 6G).

480

481 **Fig 6. Proteomic analysis of wild-type and PEG10-deficient TSCs.**

482 (A and B) Volcano plots of total protein levels (A) or phosphorylation levels at unique  
483 phosphosites (B) in wild-type (WT) versus PEG10-deficient (KO) TSCs after 0 and 5 days of  
484 differentiation. Results are representative of 3 independent experiments. (C) Venn diagram  
485 indicates the total number of proteins identified and quantified by global proteome profiling (GPP)  
486 and phosphoproteome profiling (pSTY). (D) Fraction of proteins (GPP) or phosphosites on  
487 Ser/Thr/Try (pSTY) with levels changing more than 2-fold (p-value  $\leq 0.05$ ) in PEG10 KO TSCs  
488 compared to WT TSCs after 0 and 5 days of differentiation. (E) Western blots of WT and PEG10  
489 KO TSCs after 0 and 9 days of differentiation. (F) Pathways highlighted by the Broad Institute  
490 gene set enrichment analysis of proteins with significantly changing phosphorylation levels in  
491 PEG10 KO TSCs compared to WT TSCs. (G) Diagram indicates the position of phosphosites in  
492 PEG10.

493

494 **PEG10 binds to cellular RNAs.**

495 The PEG10 Gag domain harbors a conserved zinc finger (ZnF) motif (12) that is reminiscent of  
496 the ZnF motifs in orthoretroviral Gags for binding and packaging nucleic acids (43). Therefore,  
497 we performed eCLIP-seq (enhanced crosslinking and immunoprecipitation - sequencing) (37) on  
498 wild-type and PEG10-deficient TSCs to determine if PEG10 was an RNA binding protein. PEG10  
499 interacted with the 3' untranslated regions (UTRs) of approximately 840 and 3,680 unique mRNAs  
500 after zero and five days of differentiation (normoxic conditions), respectively (Fig 7, A and B; data  
501 available in full through the GEO database, accession GSE122217). However, these 3' UTRs did  
502 not have any RNA sequence motifs in common (Fig 7C), which could indicate that RNA secondary  
503 structure determines PEG10 binding. PEG10 was bound to its own mRNA (Fig 7D) and to RNAs  
504 encoding kinases (MAPK1, MAP2K1, GSK3 $\beta$ , ROCK1, and ROCK2) and regulators of signaling  
505 pathways (CMKLR1, TGF $\alpha$ , CBL, GAB1, and HBEGF). Our RNA-seq dataset revealed that a  
506 large number of PEG10-bound transcripts, including *Hbegf* (heparin-binding EGF-like growth  
507 factor), showed increased expression in wild-type TSCs after differentiation but did not increase  
508 in PEG10-deficient TSCs (Fig 7, D and E). HBEGF protein was also less abundant in PEG10-  
509 deficient TSCs than in WT TSCs after 5 days of differentiation (Fig 6A). *Hbegf* stood out in this  
510 list of genes because of its important role in placentation (44). Therefore, RNA binding by PEG10  
511 appears to promote the expression of genes necessary for differentiation of the placental lineages.

512

513 **Fig 7. PEG10 binds to RNA.**

514 (A) Venn diagram showing RNA transcripts bound to PEG10 after 0 and 5 days of differentiation  
515 under normoxic conditions. (B) Graph indicates the distribution of 5'-end eCLIP reads after

516 immunoprecipitating PEG10 from wild-type (WT) and PEG10-deficient (KO) TSCs. Reads are  
517 normalized to sequencing depth. (C) Diagram indicates the percentage distribution of nucleotides  
518 in PEG10-bound and unbound 3' UTRs. (D) eCLIP-seq data from WT and PEG10 KO TSCs.  
519 Blue boxes at the top indicate the location of the genes. (E) Scatter plot comparing RNA-seq and  
520 eCLIP peak scores from WT and PEG10 KO TSCs. Genes are shaded red if they are up-regulated  
521 in WT TSCs by RNA-seq ( $\log_2$  fold change  $>1$  and  $p$ -value  $<0.05$ ), grey if they are unchanged  
522 ( $\log_2$  fold change  $<1$  or  $>-1$ ), and green if they are down-regulated in WT TSCs ( $\log_2$  fold change  
523  $<-1$  and  $p$ -value  $<0.05$ ). Results are representative of 2 independent experiments.

524

525 In summary, despite its domestication, *Peg10* maintains several hallmarks of retroviral and  
526 retrotransposon Gag proteins. The Gag domain of PEG10 supports the budding of virus-like  
527 particles, which are released from the cell and can be recovered from exosome preparations. ARC  
528 (activity regulated cytoskeletal-associated protein) is another retroviral-like Gag protein that drives  
529 the budding of extracellular vesicles (46, 47). ARC, like PEG10, binds to its own mRNA. The  
530 release and uptake of *Arc*-containing VLPs by neurons is considered a mechanism of intercellular  
531 communication (46, 47). Additional work is needed to determine if PEG10 fulfils a similar  
532 function.

533

## 534 **ACKNOWLEDGMENTS**

535 PTMscan® is performed at Genentech under limited license from Cell Signaling Technologies  
536 (Danvers, MA). We thank Ben Haley for reagents; Woong Kim and Daisy Bustos for technical  
537 assistance.

538



539 **REFERENCES**

- 540 1. Platt RN, 2nd, Vandewege MW, Ray DA. Mammalian transposable elements and their  
541 impacts on genome evolution. *Chromosome Res.* 2018;26: 25-43.
- 542 2. Konkel MK, Batzer MA. A mobile threat to genome stability: The impact of non-LTR  
543 retrotransposons upon the human genome. *Semin Cancer Biol.* 2010;20: 211-221.
- 544 3. Kidwell MG, Lisch D. Transposable elements as sources of variation in animals and  
545 plants. *Proc Natl Acad Sci U S A.* 1997;94: 7704-7711.
- 546 4. Le Rouzic A, Boutin TS, Capy P. Long-term evolution of transposable elements. *Proc*  
547 *Natl Acad Sci U S A.* 2007;104: 19375-19380.
- 548 5. Yoder JA, Walsh CP, Bestor TH. Cytosine methylation and the ecology of intragenomic  
549 parasites. *Trends Genet.* 1997;13: 335-340.
- 550 6. Volff JN. Turning junk into gold: domestication of transposable elements and the  
551 creation of new genes in eukaryotes. *Bioessays.* 2006;28: 913-922.
- 552 7. Mi S, Lee X, Li X, Veldman GM, Finnerty H, Racie L, et al. Syncytin is a captive  
553 retroviral envelope protein involved in human placental morphogenesis. *Nature.* 2000;403: 785-  
554 789.
- 555 8. Kaneko-Ishino T, Ishino F. The role of genes domesticated from LTR retrotransposons  
556 and retroviruses in mammals. *Front Microbiol.* 2012;3: 262.
- 557 9. Grow EJ, Flynn RA, Chavez SL, Bayless NL, Wossidlo M, Wesche DJ, et al. Intrinsic  
558 retroviral reactivation in human preimplantation embryos and pluripotent cells. *Nature.*  
559 2015;522: 221-225.
- 560 10. Malik HS. Retroviruses push the envelope for mammalian placentation. *Proc Natl Acad*  
561 *Sci U S A.* 2012;109: 2184-2185.

- 562 11. Ono R, Kobayashi S, Wagatsuma H, Aisaka K, Kohda T, Kaneko-Ishino T, et al. A  
563 retrotransposon-derived gene, PEG10, is a novel imprinted gene located on human chromosome  
564 7q21. *Genomics*. 2001;73: 232-237.
- 565 12. Clark MB, Janicke M, Gottesbuhren U, Kleffmann T, Legge M, Poole ES, et al.  
566 Mammalian gene PEG10 expresses two reading frames by high efficiency -1 frameshifting in  
567 embryonic-associated tissues. *J Biol Chem*. 2007;282: 37359-37369.
- 568 13. Ono R, Nakamura K, Inoue K, Naruse M, Usami T, Wakisaka-Saito N, et al. Deletion of  
569 Peg10, an imprinted gene acquired from a retrotransposon, causes early embryonic lethality.  
570 *Nature genetics*. 2006;38: 101-106.
- 571 14. Okabe H, Satoh S, Furukawa Y, Kato T, Hasegawa S, Nakajima Y, et al. Involvement of  
572 PEG10 in human hepatocellular carcinogenesis through interaction with SIAH1. *Cancer Res*.  
573 2003;63: 3043-3048.
- 574 15. Akamatsu S, Wyatt AW, Lin D, Lysakowski S, Zhang F, Kim S, et al. The Placental  
575 Gene PEG10 Promotes Progression of Neuroendocrine Prostate Cancer. *Cell Rep*. 2015;12: 922-  
576 936.
- 577 16. Ramalho-Santos M, Yoon S, Matsuzaki Y, Mulligan RC, Melton DA. "Stemness":  
578 transcriptional profiling of embryonic and adult stem cells. *Science*. 2002;298: 597-600.
- 579 17. Ivanova NB, Dimos JT, Schaniel C, Hackney JA, Moore KA, Lemischka IR. A stem cell  
580 molecular signature. *Science*. 2002;298: 601-604.
- 581 18. Van Hoof D, Passier R, Ward-Van Oostwaard D, Pinkse MW, Heck AJ, Mummery CL,  
582 et al. A quest for human and mouse embryonic stem cell-specific proteins. *Mol Cell Prot*.  
583 2006;5: 1261-1273.

- 584 19. Naik E, Webster JD, DeVoss J, Liu J, Suriben R, Dixit VM. Regulation of proximal T  
585 cell receptor signaling and tolerance induction by deubiquitinase Usp9X. *J Exp Med.* 2014;211:  
586 1947-1955.
- 587 20. Schwickart M, Huang X, Lill JR, Liu J, Ferrando R, French DM, et al. Deubiquitinase  
588 USP9X stabilizes MCL1 and promotes tumour cell survival. *Nature.* 2010;463: 103-107.
- 589 21. Naik E, Dixit VM. Usp9X Is Required for Lymphocyte Activation and Homeostasis  
590 through Its Control of ZAP70 Ubiquitination and PKCbeta Kinase Activity. *J Immunol.*  
591 2016;196: 3438-3451.
- 592 22. Xie Y, Avello M, Schirle M, McWhinnie E, Feng Y, Bric-Furlong E, et al.  
593 Deubiquitinase FAM/USP9X interacts with the E3 ubiquitin ligase SMURF1 protein and  
594 protects it from ligase activity-dependent self-degradation. *J Biol Chem.* 2013;288: 2976-2985.
- 595 23. Khan OM, Carvalho J, Spencer-Dene B, Mitter R, Frith D, Snijders AP, et al. The  
596 deubiquitinase USP9X regulates FBW7 stability and suppresses colorectal cancer. *J Clin Invest.*  
597 2018;128: 1326-1337.
- 598 24. Seibler J, Zevnik B, Kuter-Luks B, Andreas S, Kern H, Hennek T, et al. Rapid generation  
599 of inducible mouse mutants. *Nucleic Acids Res.* 2003;31: e12.
- 600 25. Choi HJ, Sanders TA, Tormos KV, Ameri K, Tsai JD, Park AM, et al. ECM-dependent  
601 HIF induction directs trophoblast stem cell fate via LIMK1-mediated cytoskeletal rearrangement.  
602 *PloS one.* 2013;8: e56949.
- 603 26. Choi H, Larsen B, Lin ZY, Breitkreutz A, Mellacheruvu D, Fermin D, et al. SAINT:  
604 probabilistic scoring of affinity purification-mass spectrometry data. *Nat Methods.* 2011;8: 70-  
605 73.

- 606 27. Bingol B, Tea JS, Phu L, Reichelt M, Bakalarski CE, Song Q, et al. The mitochondrial  
607 deubiquitinase USP30 opposes parkin-mediated mitophagy. *Nature*. 2014;510: 370-375.
- 608 28. Kirkpatrick DS, Bustos DJ, Dogan T, Chan J, Phu L, Young A, et al. Phosphoproteomic  
609 characterization of DNA damage response in melanoma cells following MEK/PI3K dual  
610 inhibition. *Proc Natl Acad Sci U S A*.2013;110: 19426-19431.
- 611 29. Paulo JA, Gygi SP. Nicotine-induced protein expression profiling reveals mutually  
612 altered proteins across four human cell lines. *Proteomics*. 2017;17. doi:  
613 10.1002/pmic.201600319.
- 614 30. McAlister GC, Nusinow DP, Jedrychowski MP, Wuhr M, Huttlin EL, Erickson BK, et al.  
615 MultiNotch MS3 enables accurate, sensitive, and multiplexed detection of differential expression  
616 across cancer cell line proteomes. *Anal Chem*. 2014;86: 7150-7158.
- 617 31. Beausoleil SA, Villen J, Gerber SA, Rush J, Gygi SP. A probability-based approach for  
618 high-throughput protein phosphorylation analysis and site localization. *Nat Biotech*. 2006;24:  
619 1285-1292.
- 620 32. Zhuang G, Yu K, Jiang Z, Chung A, Yao J, Ha C, et al. Phosphoproteomic analysis  
621 implicates the mTORC2-FoxO1 axis in VEGF signaling and feedback activation of receptor  
622 tyrosine kinases. *Sci Signal*. 2013;6: ra25.
- 623 33. Choi M, Chang CY, Clough T, Broudy D, Killeen T, MacLean B, et al. MSstats: an R  
624 package for statistical analysis of quantitative mass spectrometry-based proteomic experiments.  
625 *Bioinformatics*. 2014;30: 2524-2526.
- 626 34. Subramanian A, Tamayo P, Mootha VK, Mukherjee S, Ebert BL, Gillette MA, et al.  
627 Gene set enrichment analysis: a knowledge-based approach for interpreting genome-wide  
628 expression profiles. *Proc Natl Acad Sci U S A*. 2005;102: 15545-15550.

- 629 35. Ritchie ME, Phipson B, Wu D, Hu Y, Law CW, Shi W, et al. limma powers differential  
630 expression analyses for RNA-sequencing and microarray studies. *Nucleic Acids Res.* 2015;43:  
631 e47.
- 632 36. Alhamdoosh M, Ng M, Wilson NJ, Sheridan JM, Huynh H, Wilson MJ, et al. Combining  
633 multiple tools outperforms individual methods in gene set enrichment analyses. *Bioinformatics.*  
634 2017;33: 414-424.
- 635 37. Van Nostrand EL, Pratt GA, Shishkin AA, Gelboin-Burkhart C, Fang MY, Sundararaman  
636 B, et al. Robust transcriptome-wide discovery of RNA-binding protein binding sites with  
637 enhanced CLIP (eCLIP). *Nat Methods.* 2016;13: 508-514.
- 638 38. Bustos D, Bakalarski CE, Yang Y, Peng J, Kirkpatrick DS. Characterizing ubiquitination  
639 sites by peptide-based immunoaffinity enrichment. *Mol Cell Prot.* 2012;11: 1529-1540.
- 640 39. Finnegan DJ. Retrotransposons. *Current biology : CB.* 2012;22: R432-R437.
- 641 40. Willms E, Johansson HJ, Mager I, Lee Y, Blomberg KE, Sadik M, et al. Cells release  
642 subpopulations of exosomes with distinct molecular and biological properties. *Sci Rep.* 2016;6:  
643 22519.
- 644 41. Prekeris R, Yang B, Oorschot V, Klumperman J, Scheller RH. Differential roles of  
645 syntaxin 7 and syntaxin 8 in endosomal trafficking. *Mol Biol Cell.* 1999;10:3891-3908.
- 646 42. Antonin W, Riedel D, von Mollard GF. The SNARE Vti1a-beta is localized to small  
647 synaptic vesicles and participates in a novel SNARE complex. *J Neurosci.* 2000;20: 5724-5732.
- 648 43. Amarasinghe GK, De Guzman RN, Turner RB, Chancellor KJ, Wu ZR, Summers MF.  
649 NMR structure of the HIV-1 nucleocapsid protein bound to stem-loop SL2 of the psi-RNA  
650 packaging signal. Implications for genome recognition. *J Mol Biol.* 2000;301: 491-511.

- 651 44. Liu Z, Skafar DF, Kilburn B, Das SK, Armant DR. Extraembryonic Heparin-Binding  
652 Epidermal Growth Factor-Like growth factor (HBEGF) deficiency compromises placentation in  
653 mice. *Biol Reprod.* 2019;100: 217-226.
- 654 45. Campillos M, Doerks T, Shah PK, Bork P. Computational characterization of multiple  
655 Gag-like human proteins. *Trends Genet.* 2006;22: 585-589.
- 656 46. Ashley J, Cordy B, Lucia D, Fradkin LG, Budnik V, Thomson T. Retrovirus-like Gag  
657 Protein Arc1 Binds RNA and Traffics across Synaptic Boutons. *Cell.* 2018;172: 262-274.
- 658 47. Pastuzyn ED, Day CE, Kearns RB, Kyrke-Smith M, Taibi AV, McCormick J, et al. The  
659 Neuronal Gene Arc Encodes a Repurposed Retrotransposon Gag Protein that Mediates  
660 Intercellular RNA Transfer. *Cell.* 2018;172: 275-288.
- 661 48. D'Souza V, Melamed J, Habib D, Pullen K, Wallace K, Summers MF. Identification of a  
662 high affinity nucleocapsid protein binding element within the Moloney murine leukemia virus  
663 Psi-RNA packaging signal: implications for genome recognition. *J Mol Biol.* 2001;314: 217-232.
- 664 49. Jessmon P, Leach RE, Armant DR. Diverse functions of HBEGF during pregnancy. *Mol*  
665 *Reprod Dev.* 2009;76: 1116-1127.
- 666 50. Huttlin EL, Ting L, Bruckner RJ, Gebreab F, Gygi MP, Szpyt J, et al. The BioPlex  
667 Network: A Systematic Exploration of the Human Interactome. *Cell.* 2015;162: 425-440.
- 668 51. Huttlin EL, Bruckner RJ, Paulo JA, Cannon JR, Ting L, Baltier K, et al. Architecture of  
669 the human interactome defines protein communities and disease networks. *Nature.* 2017;545:  
670 505-509.
- 671



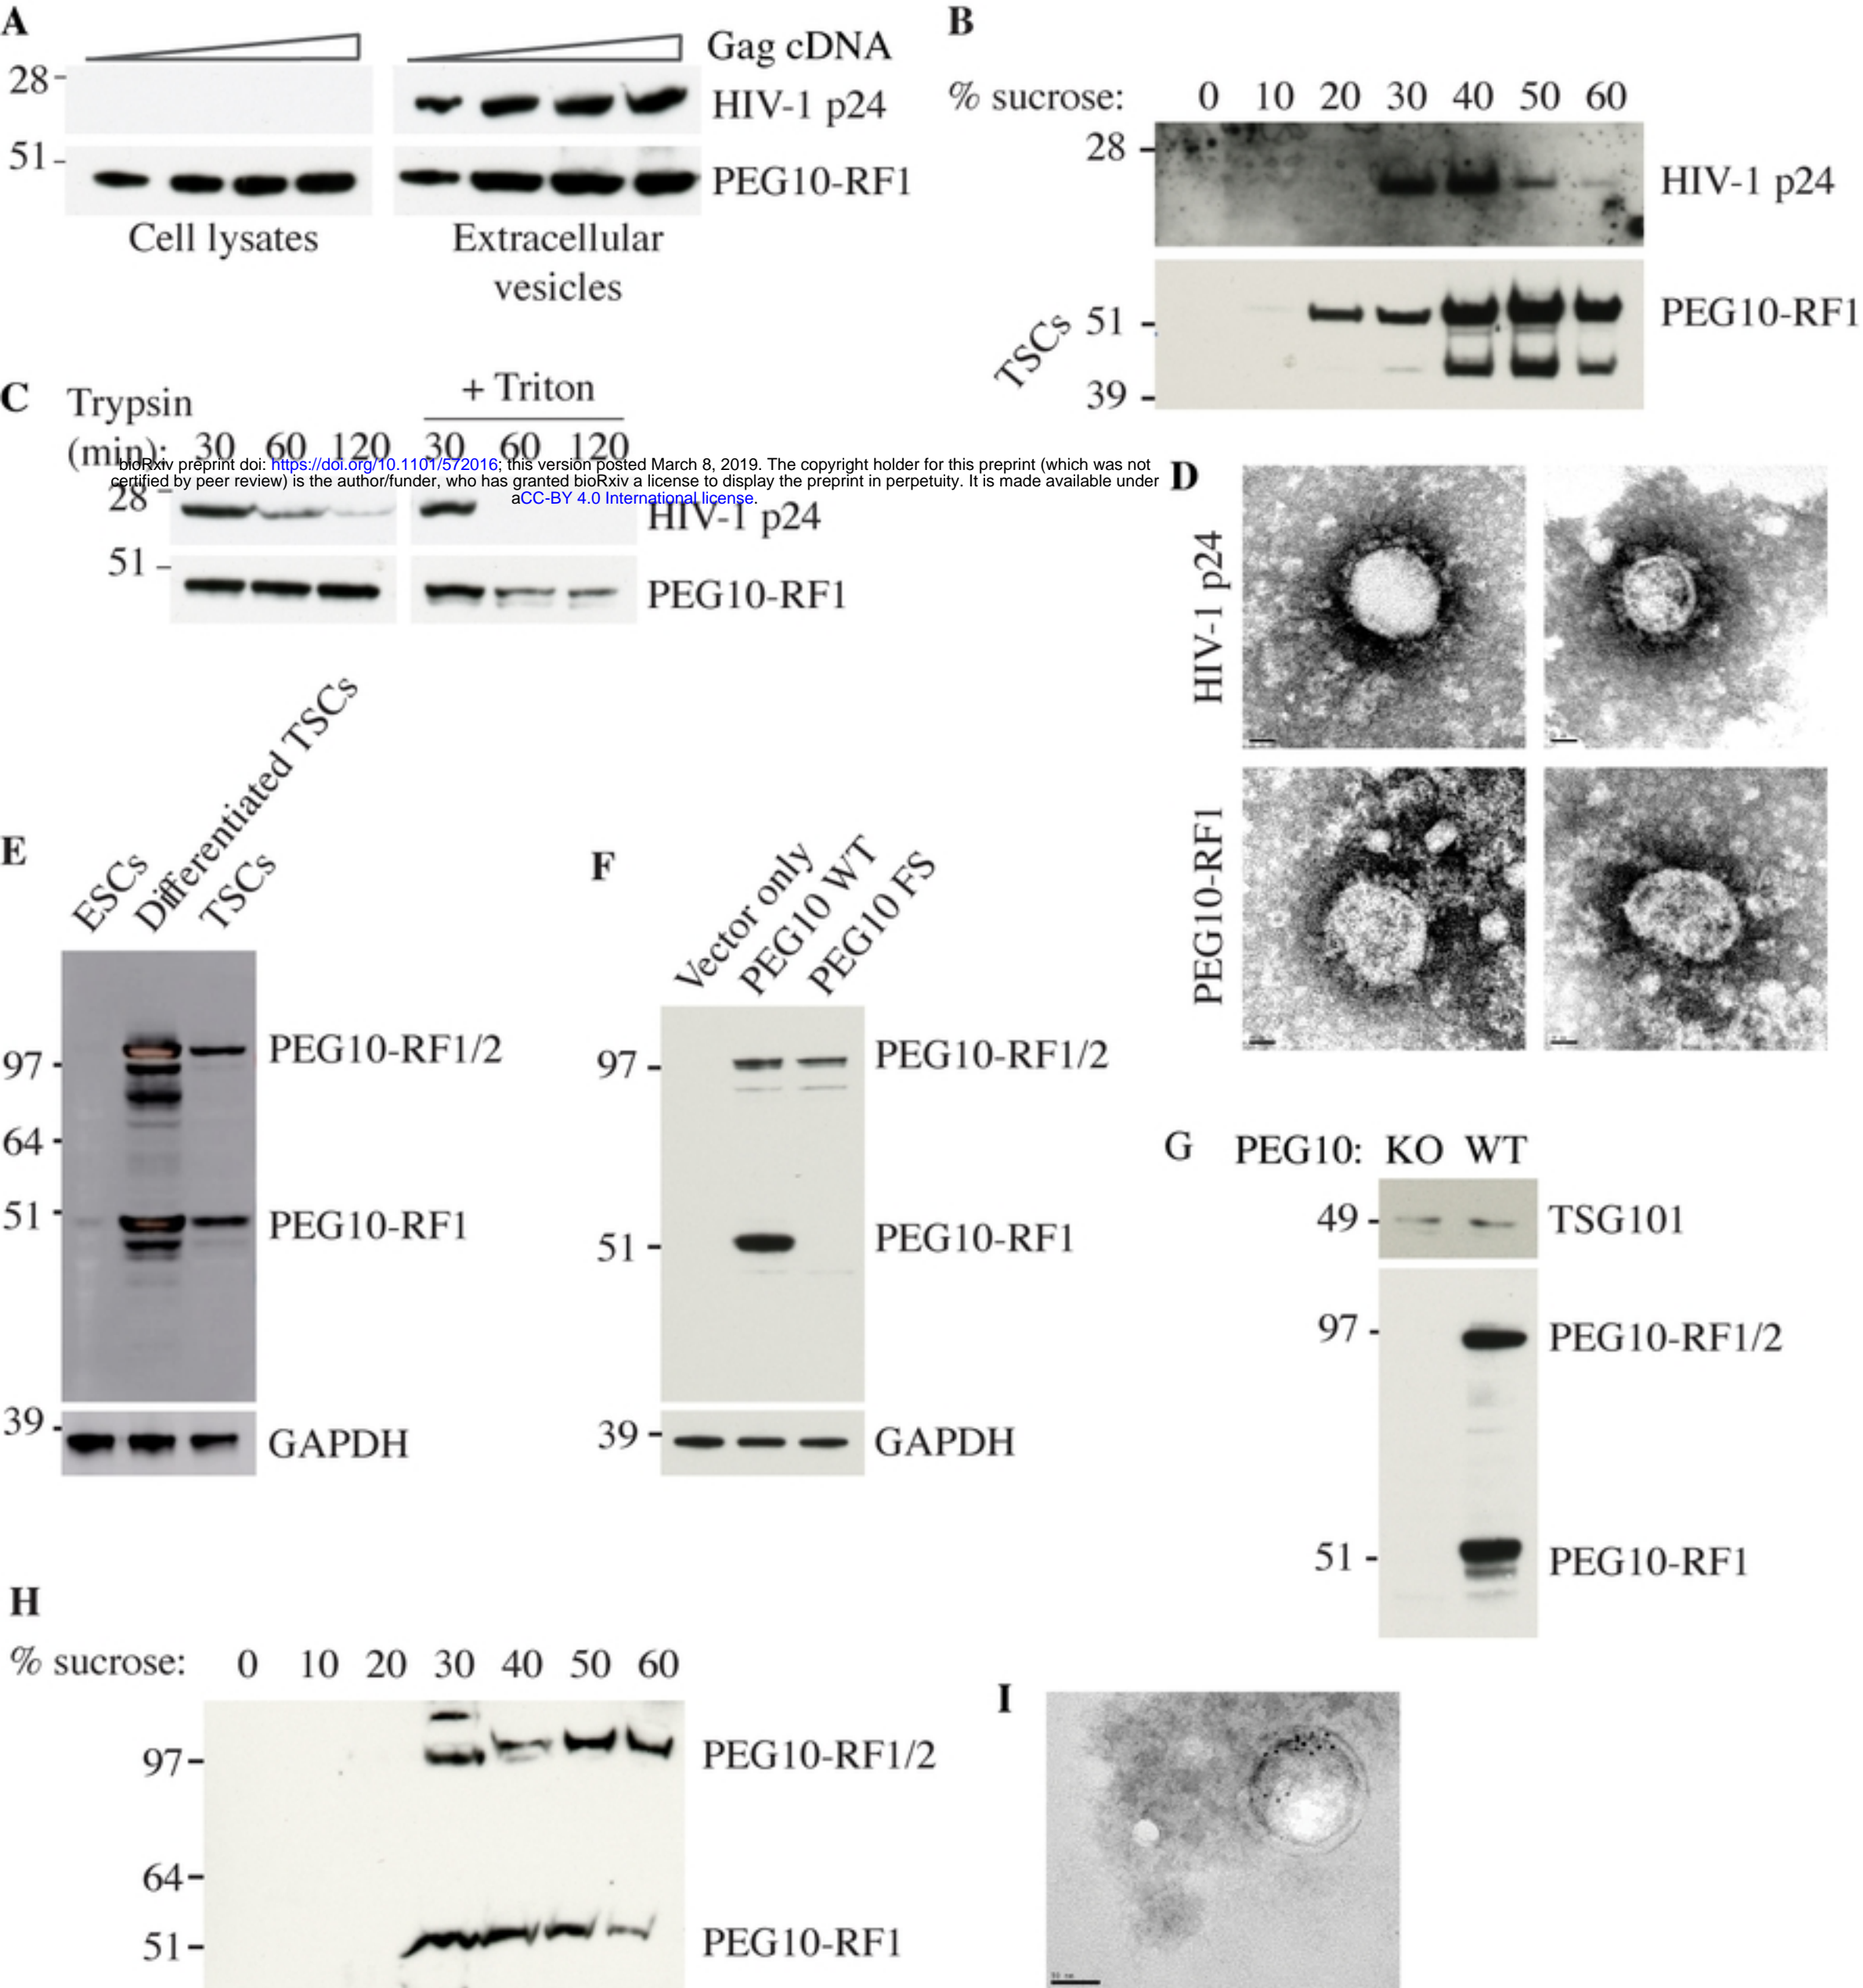

Figure 2



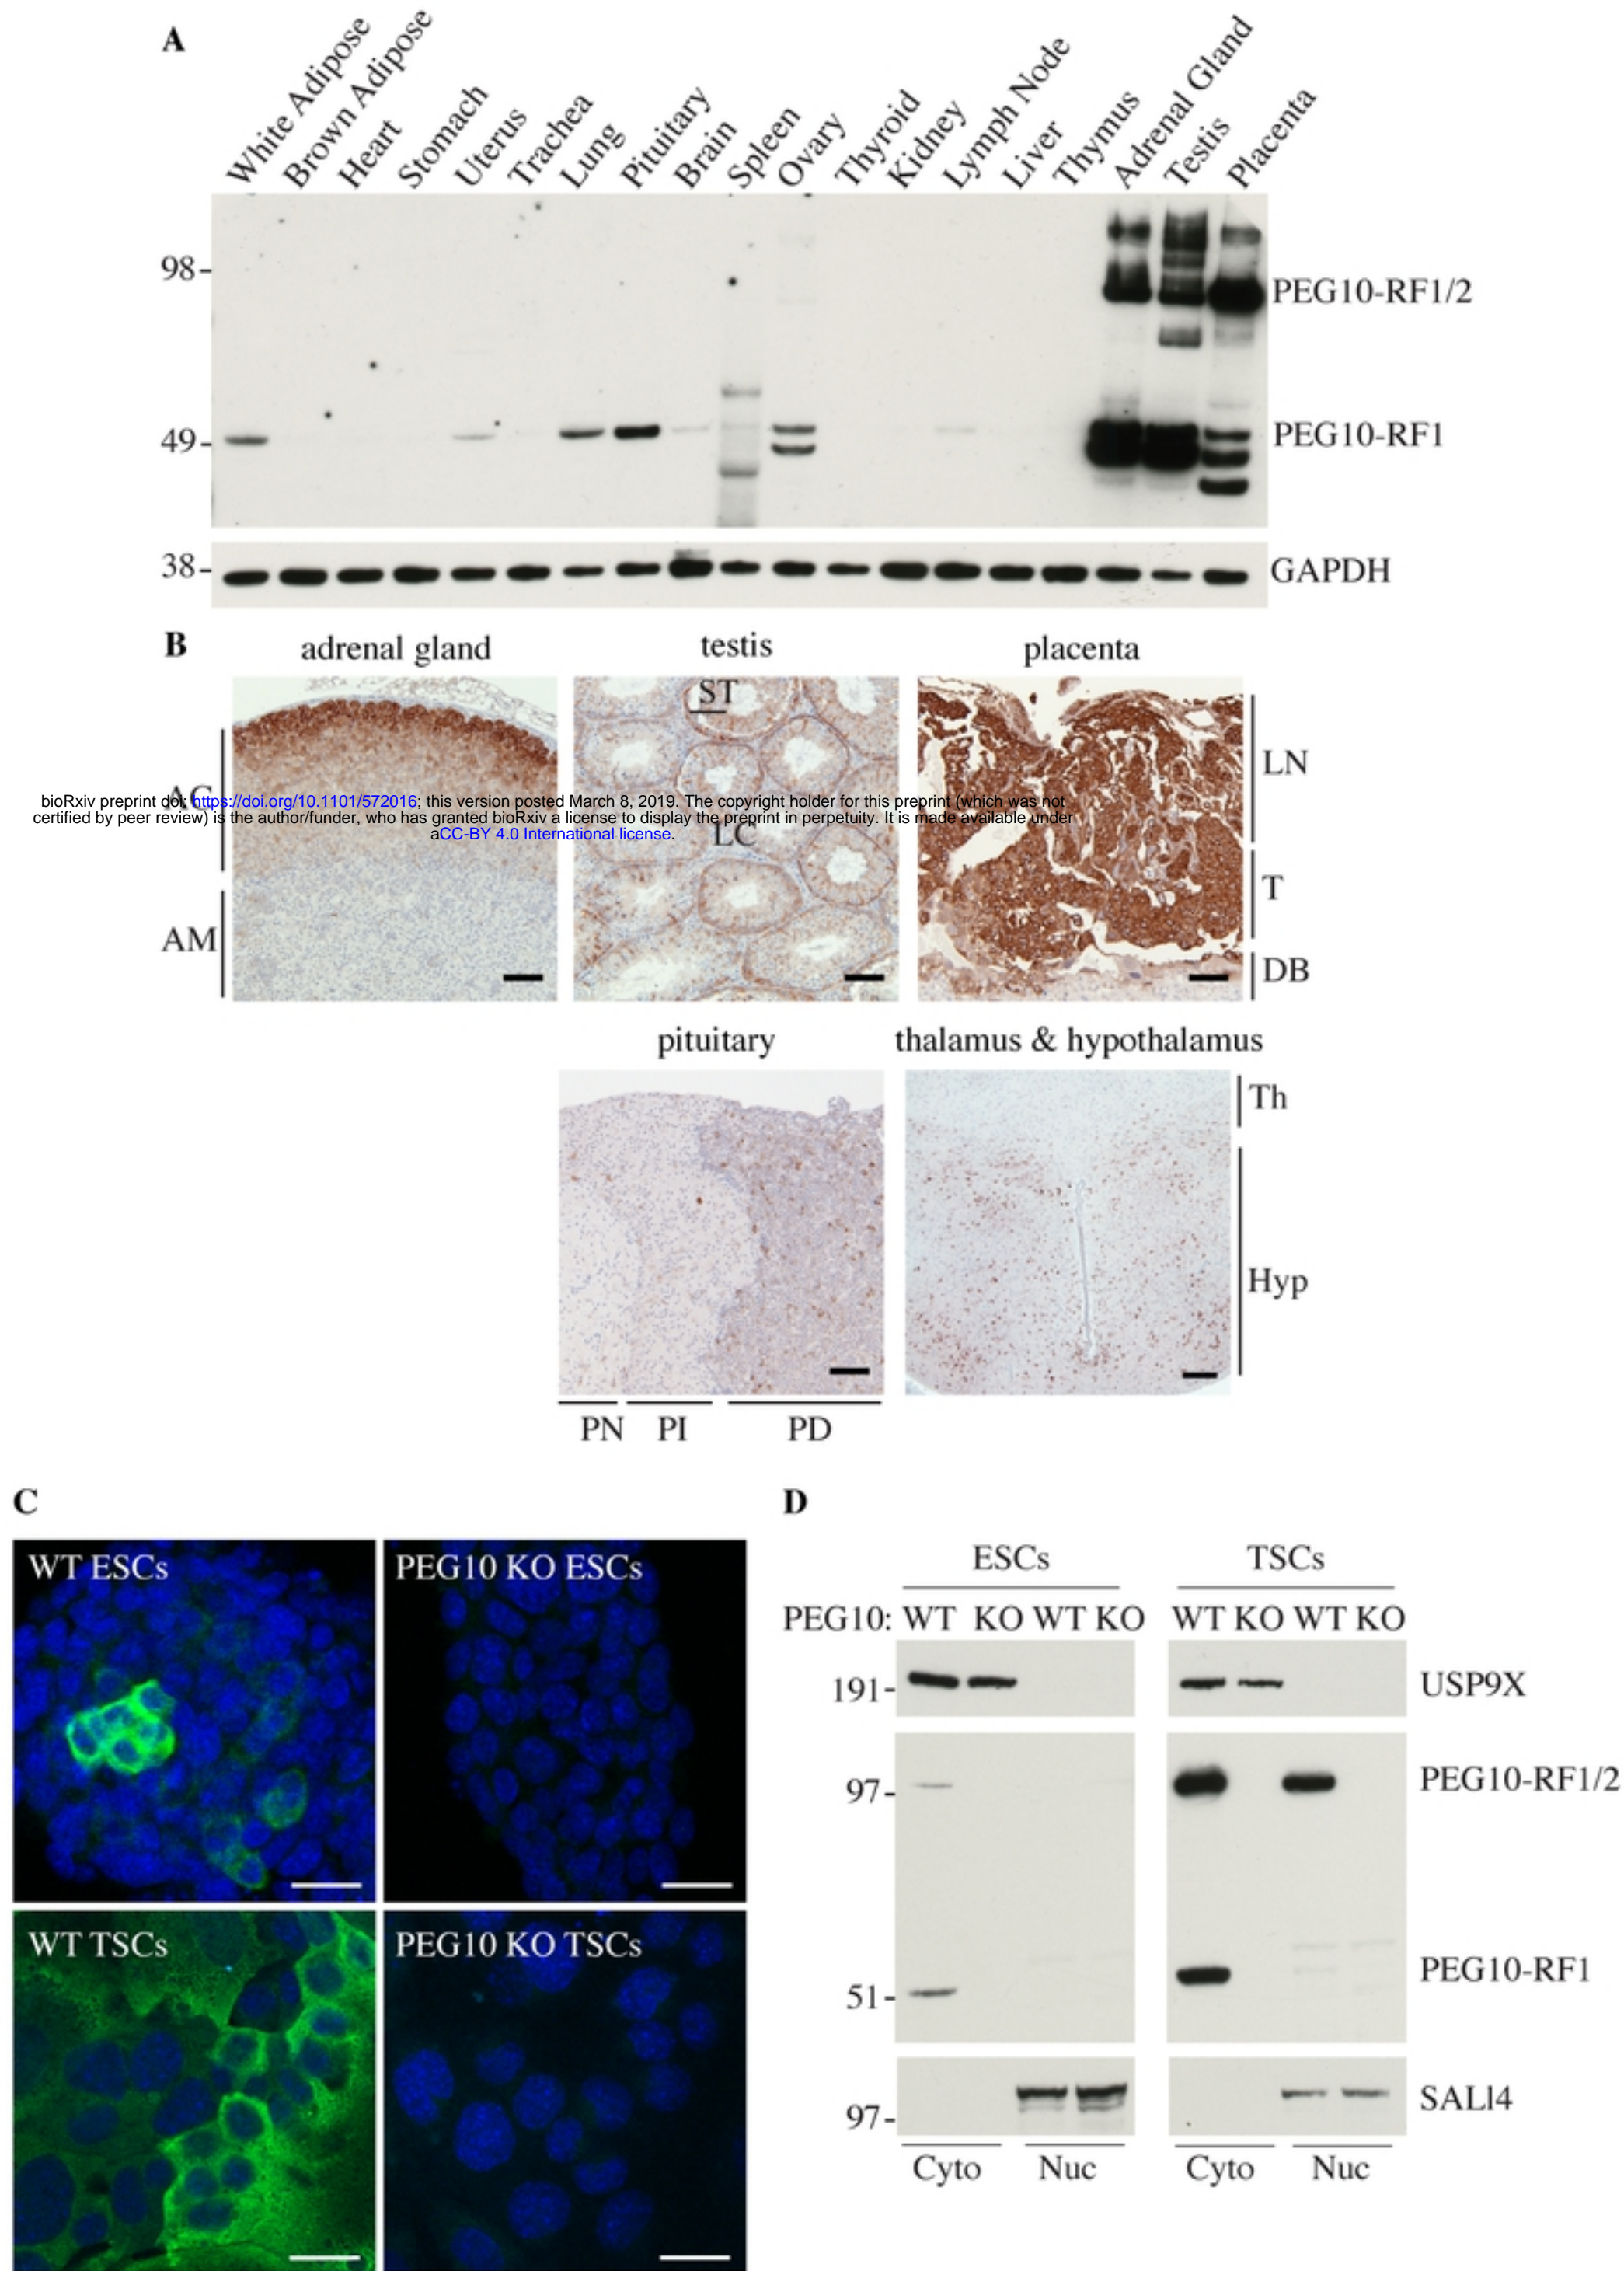

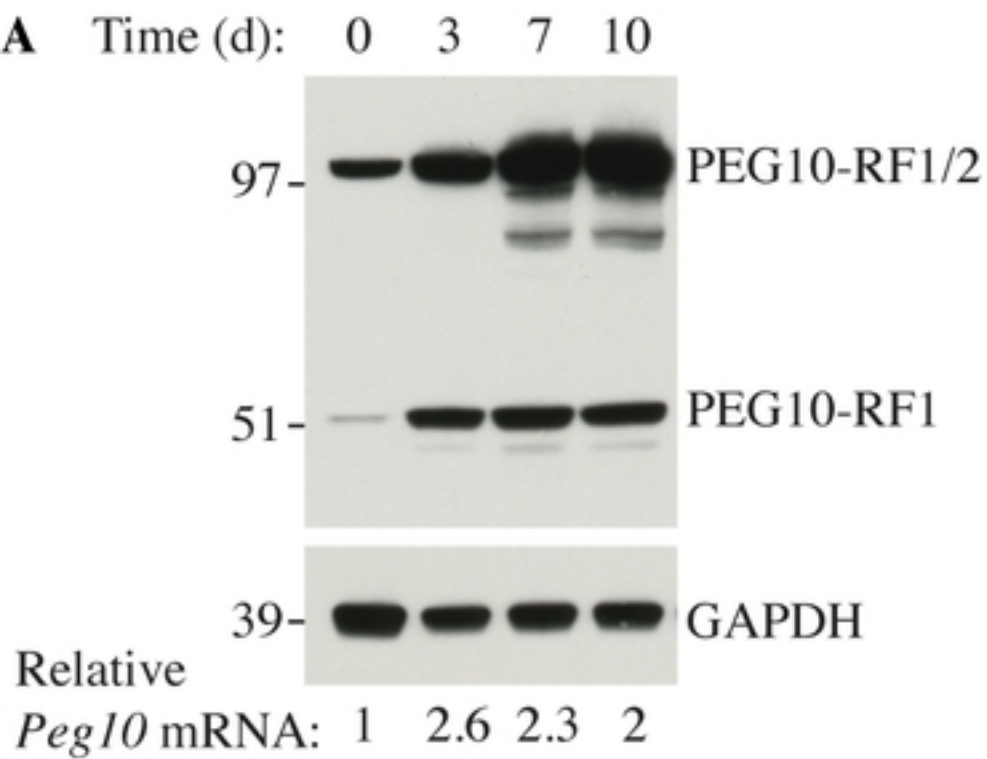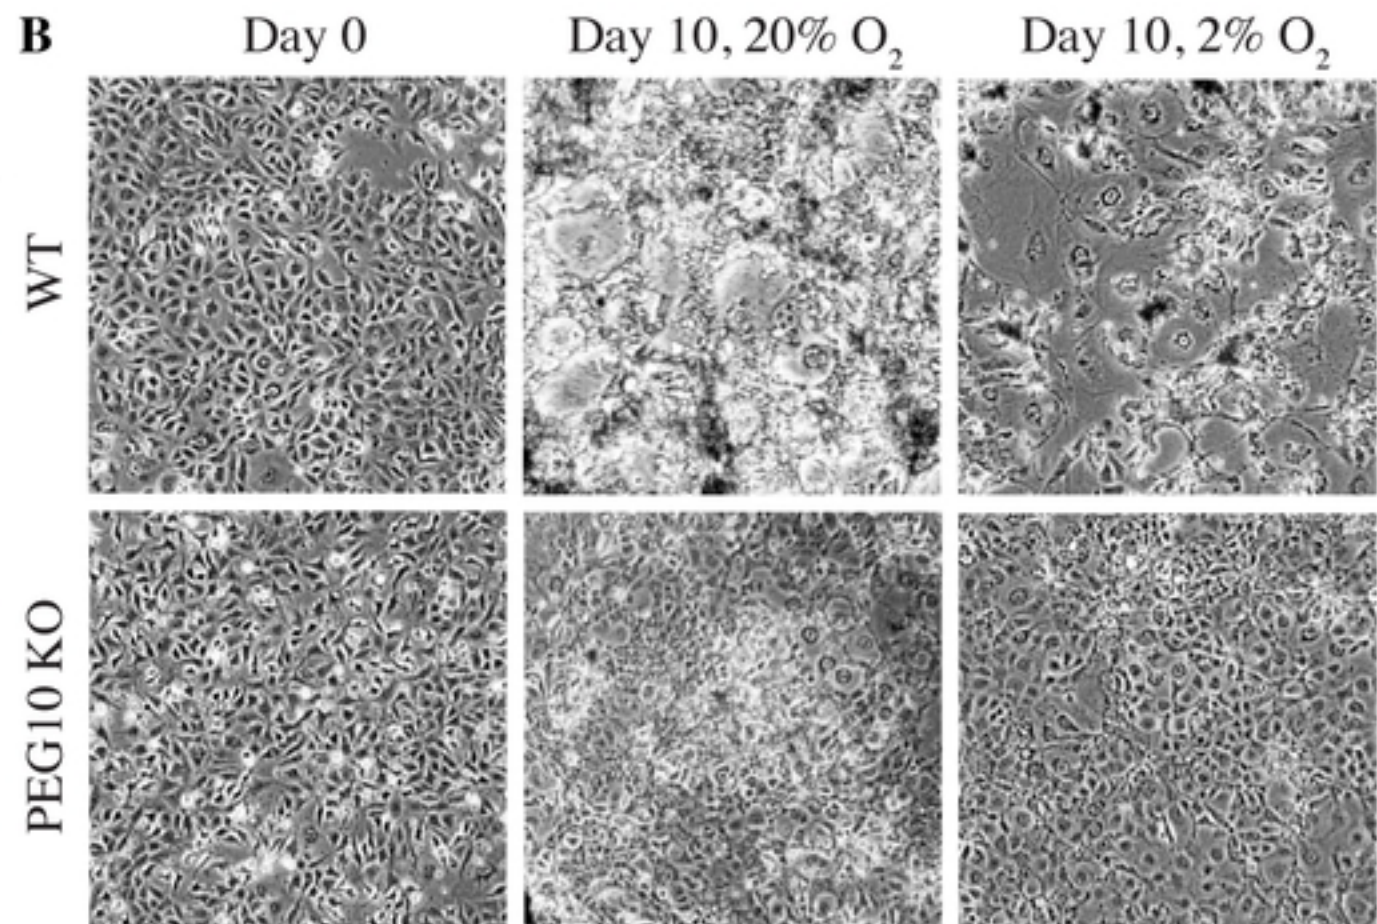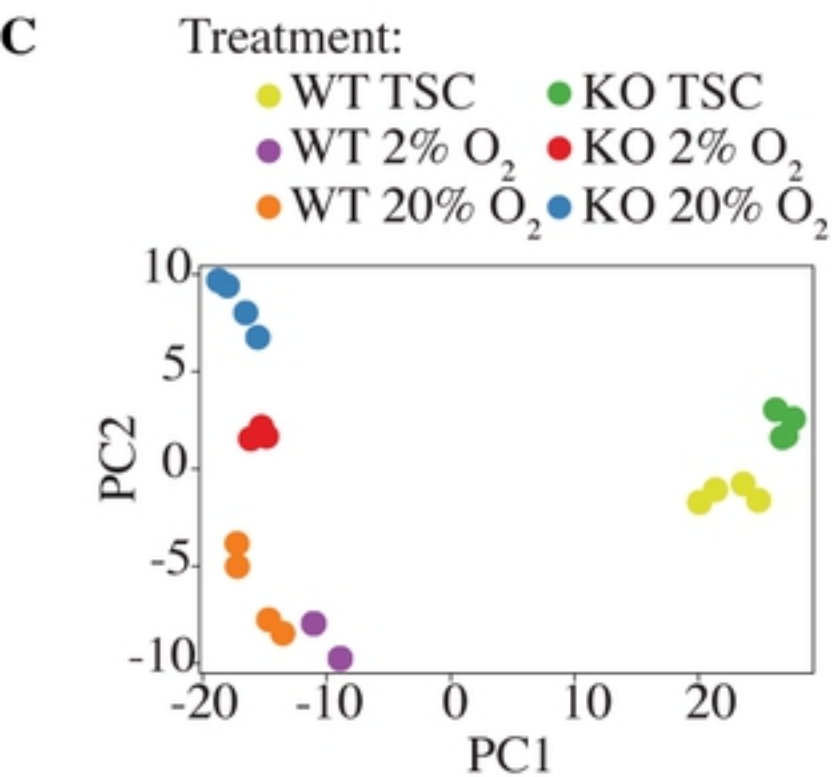

Figure 5

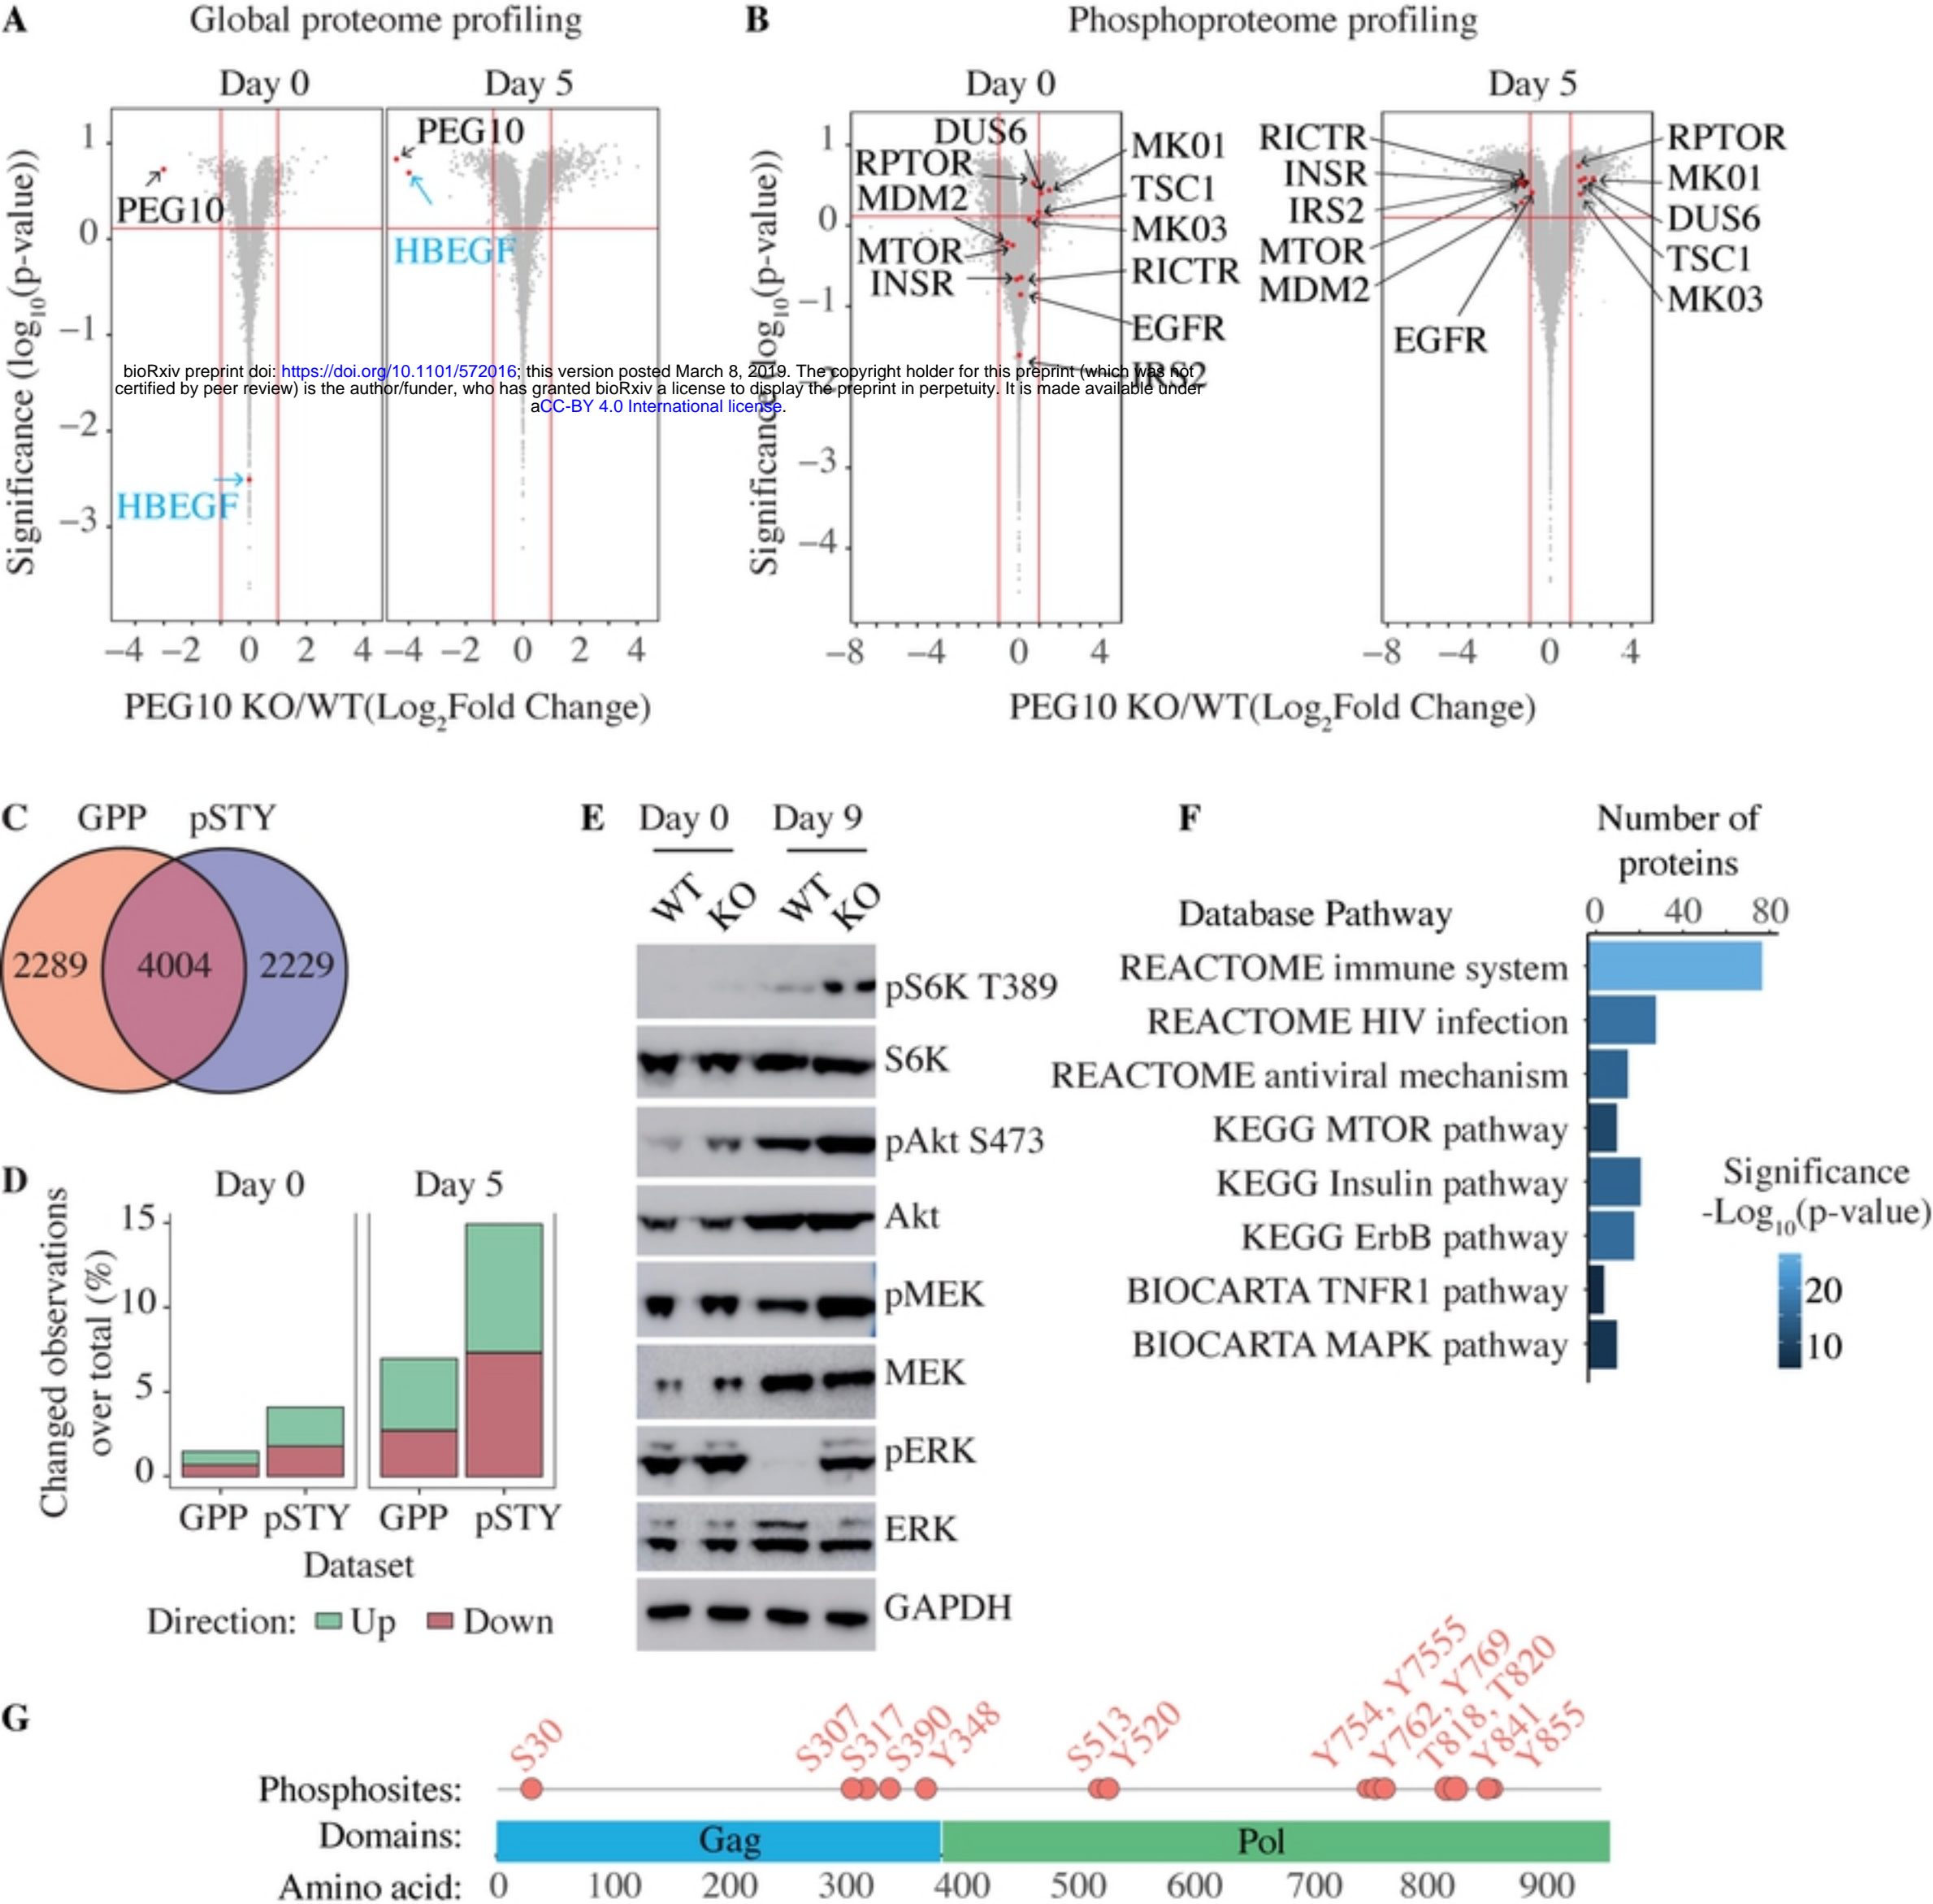

Figure 6

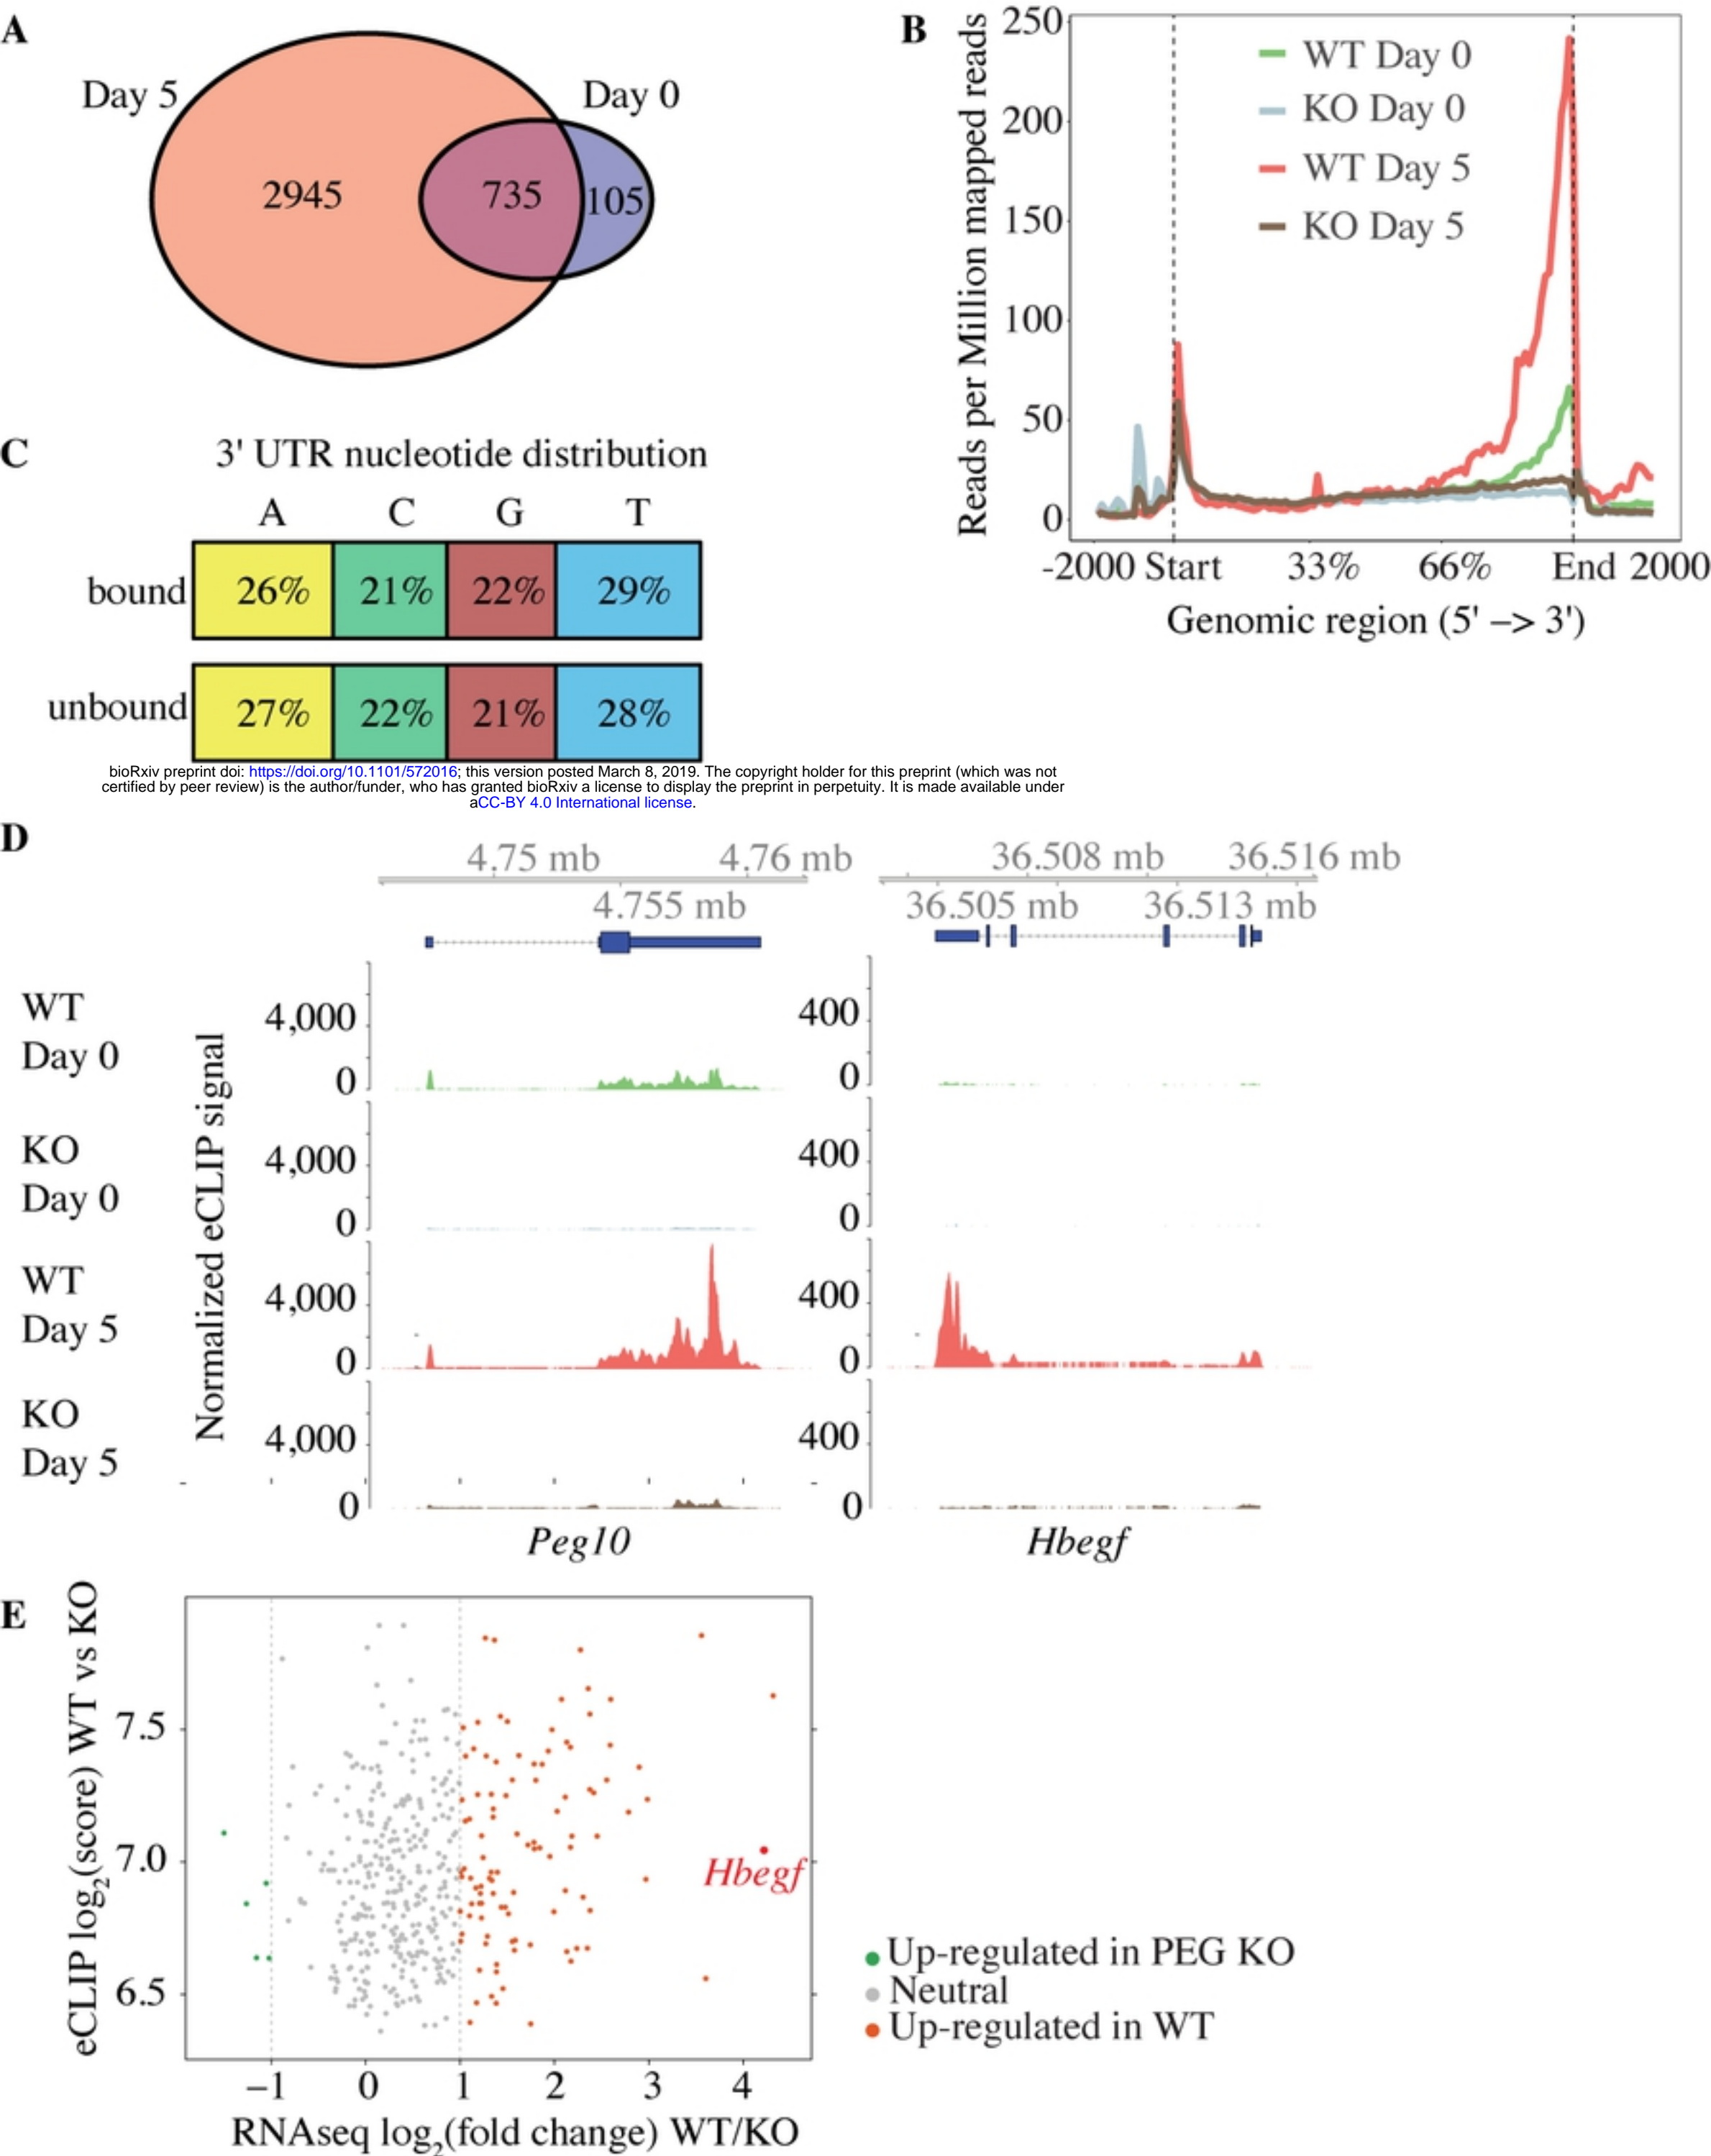

Figure 7

**A**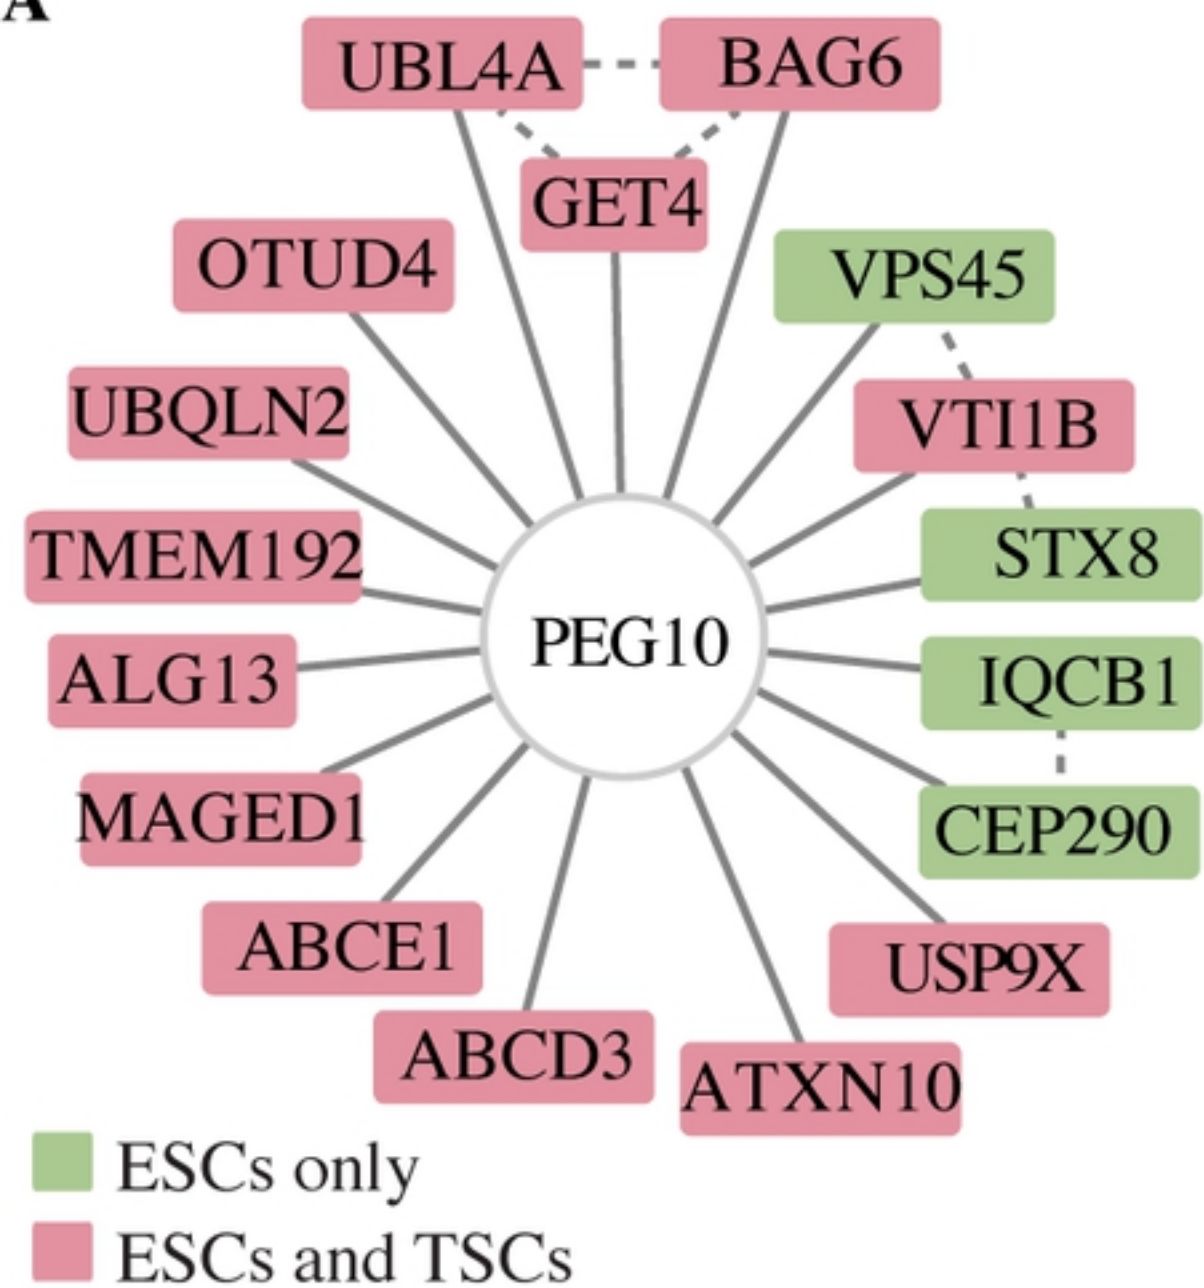**B**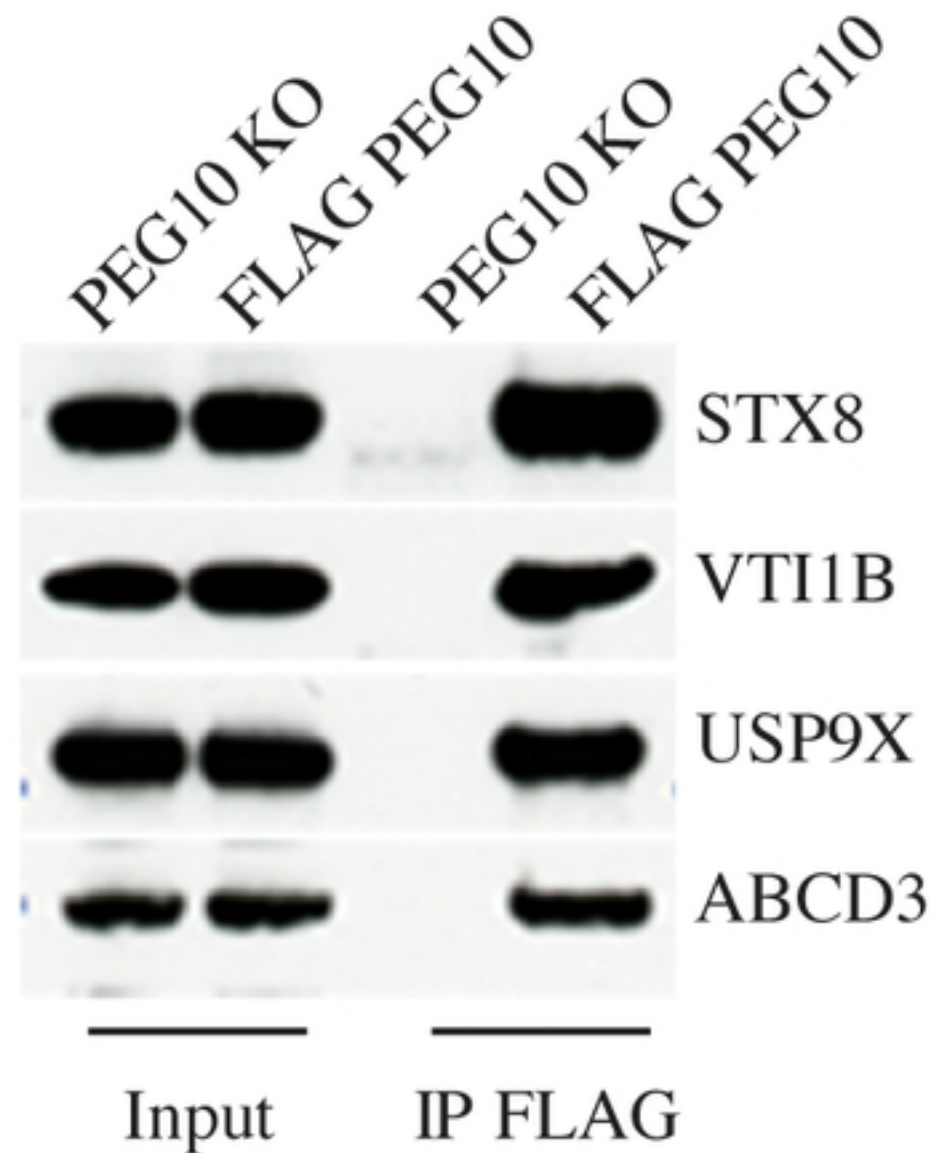

Figure 3
